# Supplementary material for: Transcriptomic Profiling of Arabidopsis thaliana Mutant pad2.1 in Response to Combined Cold and Osmotic Stress
Source: PLoS One. 2015 Mar 30;10(3):e0122690. doi: 10.1371/journal.pone.0122690 (PMC4379064; doi:10.1371/journal.pone.0122690)
Supplement: S1 Table — (XLSX) [file pone.0122690.s005.xlsx]

## Sheet: Sheet1
S1A Table . Up-regulated Genes in response to combined stress treatment in pad2.1.
ProbeName	TAIR_Locus	GeneName	p -Value	Pad2.1_GeomeanFold	corrected p-value (Benjamini-Hochberg FDR)
GT_A_84_P546356	AT1G76610	hypothetical protein	0.000107981	1.50832	0.113342
GT_A_84_P830772	AT1G62970	AT1G62970.1	0.000339872	1.37596	0.40589
GT_A_84_P11188	AT5G42600	MRN1 (MARNERAL SYNTHASE); catalytic/ marneral synthase	0.000444205	1.42634	0.241309
GT_A_84_P754740	AT1G30814	AT1G30814.2	0.000775708	1.40137	0.30324
GT_At_Specific_00007323			0.00109444	1.13463	0.354027
GT_A_84_P550860	AT2G30395	OFP17 (ARABIDOPSIS THALIANA OVATE FAMILY PROTEIN 17)	0.00112507	1.32628	0.134982
GT_A_84_P766434	AT5G40605;AT4G26360;AT1G60720	AT5G40605.1	0.0013816	1.41712	0.324502
GT_A_84_P837267		AT5G64320.1	0.00142968	1.06997	0.411603
GT_A_84_P845275	AT4G18520	AT4G18520.1	0.00143461	1.00703	0.30324
GT_A_84_P834073		AT2G41820.1	0.00160484	1.42956	0.151247
GT_A_84_P576126	AT5G12330	LRP1 (LATERAL ROOT PRIMORDIUM 1); protein homodimerization	0.0016941	2.78016	0.25518
GT_At_Specific_00256064			0.00171372	1.07256	0.32203
GT_A_84_P838635	AT3G44730	AT3G44730.1	0.00173708	1.81863	0.366961
GT_A_84_P841601		NP227505	0.00196658	2.31272	0.443466
GT_A_84_P793429		AV565572	0.00216963	1.28474	0.428337
GT_A_84_P540992	AT1G63080;AT1G63320	pentatricopeptide (PPR) repeat-containing protein	0.00217414	1.33967	0.266988
GT_A_84_P843739	AT2G47300	AT2G47300.3	0.00217533	1.18785	0.373514
GT_A_84_P755836	AT4G06742;AT1G36530;AT2G12025	AT2G12025.1	0.00235832	1.80629	0.307821
GT_A_84_P20216	AT3G05950	germin-like protein, putative	0.00244117	2.08055	0.221379
GT_A_84_P723830	AT1G25422	hypothetical protein	0.00246669	1.32772	0.201859
GT_A_84_P832114	AT5G01950	AT5G01950.1	0.00247454	1.57918	0.412567
GT_At_Specific_00292766			0.00255724	1.2157	0.483083
GT_At_Specific_00156221		AT3G21350	0.00260027	1.63586	0.434597
GT_A_84_P592287	AT5G49200	WD-40 repeat family protein / zfwd4 protein (ZFWD4)	0.00304089	2.18094	0.495626
GT_A_84_P767277	AT5G33306	AT5G33306.1	0.00335229	2.46537	0.326616
GT_A_84_P18158	AT1G57850	Toll-Interleukin-Resistance (TIR) domain-containing protein	0.00335324	1.57533	0.267315
GT_A_84_P14360	AT1G79180	MYB63 (MYB DOMAIN PROTEIN 63); DNA binding / transcription factor	0.0035123	1.03085	0.112973
GT_At_Specific_00167559			0.00371968	3.87426	0.308711
GT_A_84_P89709	AT3G18720	F-box family protein	0.00397107	1.80902	0.438519
GT_A_84_P758752	AT3G51690	AT3G51690.1	0.00416992	1.57962	0.438519
GT_A_84_P525754	AT5G62510	F-box family protein	0.00423258	1.55084	0.238452
GT_A_84_P18587	AT1G08090	ATNRT2:1 (NITRATE TRANSPORTER 2:1); nitrate transmembrane transporter	0.00426424	1.62806	0.483789
GT_A_84_P21829	AT1G14185	glucose-methanol-choline (GMC) oxidoreductase family protein	0.00431092	2.15905	0.264329
GT_A_84_P23514	AT5G51500	pectinesterase family protein	0.00437559	1.82441	0.279694
GT_A_84_P189964	AT2G19660	DC1 domain-containing protein	0.00444107	2.14666	0.250906
GT_At_Specific_00134604		AT3G03370	0.00449541	1.15593	0.422834
GT_A_84_P253555	AT4G14090	UDP-glucoronosyl/UDP-glucosyl transferase family protein	0.00456249	2.56924	0.194001
GT_A_84_P301780	AT3G20975		0.00462586	1.9968	0.144922
GT_At_Specific_00238789		AT4G37235	0.00481354	1.55427	0.350213
GT_A_84_P790814	AT5G05810	AT5G05810.1	0.00489365	1.37044	0.278716
GT_A_84_P556238			0.00502917	1.07118	0.264594
GT_A_84_P756598	AT2G14430;AT1G47860	AT2G14430.1	0.00525561	1.13616	0.220662
GT_A_84_P10012	AT4G09600	GASA3 (GAST1 PROTEIN HOMOLOG 3)	0.00529554	1.75844	0.360774
GT_A_84_P844247	AT4G14103	AT4G14103.1	0.00537208	1.43997	0.132958
GT_A_84_P823272	AT5G41330	AT5G41330.1	0.00555481	1.86687	0.282502
GT_A_84_P560446	AT1G49040	SCD1 (STOMATAL CYTOKINESIS-DEFECTIVE 1); protein binding	0.00565837	1.59688	0.26127
GT_A_84_P550153	AT3G30720	QQS (QUA-QUINE STARCH)	0.00566947	3.66072	0.306787
GT_A_84_P847118	AT1G25530	AT1G25530.1	0.00569479	1.58476	0.259038
GT_A_84_P21904	AT1G66020	terpene synthase/cyclase family protein	0.0058587	1.61686	0.65098
GT_A_84_P14803	AT4G29020	glycine-rich protein	0.00597931	1.425	0.22999
GT_A_84_P12781	AT3G54400	aspartyl protease family protein	0.00606783	1.07791	0.344548
GT_A_84_P96816	AT4G25760	AtGDU2 (Arabidopsis thaliana GLUTAMINE DUMPER 2)	0.00614714	1.47021	0.307821
GT_A_84_P786320	AT5G35935	AT5G35935.1	0.0063469	5.29858	0.195409
GT_A_84_P717970			0.00665187	1.46035	0.238452
GT_A_84_P20096	AT2G41540	GPDHC1; NAD or NADH binding / glycerol-3-phosphate dehydrogenase (NAD+)	0.00682131	1.04302	0.396661
GT_A_84_P764563	AT4G30662	AT4G30662.1	0.00683648	1.47432	0.195409
GT_A_84_P820268	AT1G07640	AT1G07640.3	0.00702571	1.20418	0.155311
GT_A_84_P509286	AT3G10290	phosphate translocator-related	0.00721972	2.28508	0.407922
GT_A_84_P305850	AT2G02010	GAD4 (glutamate decarboxylase 4); calmodulin binding	0.00745112	1.52732	0.299772
GT_A_84_P846594	AT5G59050	AT5G59050.2	0.00780909	1.17119	0.16235
GT_A_84_P12100	AT5G25980	TGG2 (GLUCOSIDE GLUCOHYDROLASE 2); hydrolase / thioglucosidase	0.00803343	1.11266	0.236402
GT_A_84_P827800	AT3G28700	AT3G28700.1	0.00851618	1.04689	0.508518
GT_A_84_P502174	AT3G09040	pentatricopeptide (PPR) repeat-containing protein	0.00867001	1.11112	0.251697
GT_A_84_P101586	AT1G43895		0.00874105	3.1008	0.113342
GT_A_84_P849244		BX840895	0.00888591	1.03369	0.307821
GT_A_84_P21915	AT1G20190	ATEXPA11 (ARABIDOPSIS THALIANA EXPANSIN 11)	0.00896234	1.26914	0.304533
GT_A_84_P836191	AT3G13030	TA52349_3702	0.00963305	1.66986	0.239779
GT_A_84_P19718	AT5G48000	CYP708A2; oxygen binding / thalianol hydroxylase	0.00987056	1.39775	0.20048
GT_A_84_P836925		AT5G35935.1	0.0100816	4.31832	0.213987
GT_A_84_P807121		TA26786_3702	0.0102059	2.03214	0.221379
GT_A_84_P848499	AT5G35935	AT5G35935.1	0.0102101	5.21292	0.195409
GT_At_Specific_00154564		AT3G20015	0.0102811	1.11208	0.191624
GT_A_84_P19719	AT5G48290	heavy-metal-associated domain-containing protein	0.0108088	1.50091	0.353273
GT_A_84_P821975		AT3G18860.1	0.0109956	1.00049	0.359229
GT_A_84_P512910	AT3G45490	hypothetical protein	0.0110693	1.05078	0.40589
GT_A_84_P824880	AT5G47990	AT5G47990.1	0.0111622	2.57602	0.316469
GT_At_Specific_00023594			0.0111888	1.38444	0.299772
GT_At_Specific_00258924		AT5G16430	0.0113282	1.01826	0.24952
GT_A_84_P759661	AT3G27500	AT3G27500.1	0.0115127	1.23681	0.169096
GT_At_Specific_00012528		AT1G11595	0.0116914	1.40684	0.186255
GT_A_84_P83519	AT1G62225	hypothetical protein	0.0118314	3.38295	0.16235
GT_A_84_P825981	AT1G71692	AT1G71692.1	0.0121089	1.76196	0.238452
GT_A_84_P20544	AT1G62670	pentatricopeptide (PPR) repeat-containing protein	0.0121716	1.68705	0.233367
GT_At_Specific_00116474			0.0126107	1.09808	0.233367
GT_A_84_P19994	AT1G08080	ACA7 (ALPHA CARBONIC ANHYDRASE 7); carbonate dehydratase/ zinc ion binding	0.0127376	2.05626	0.207827
GT_A_84_P761753	AT3G27884	AT3G27884.1	0.012934	1.65926	0.369781
GT_A_84_P793006		AV524261	0.0131117	1.26129	0.22999
GT_A_84_P116822	AT3G20530	protein kinase family protein	0.01323	1.63624	0.233367
GT_A_84_P18336	AT1G26590	zinc finger (C2H2 type) family protein	0.0136974	1.31513	0.318226
GT_A_84_P853499		BX815424	0.0138285	1.00374	0.216905
GT_A_84_P817225	AT2G46370	AT2G46370.1	0.0144029	1.29716	0.344548
GT_A_84_P14918	AT5G18450	AP2 domain-containing transcription factor, putative	0.014653	2.06077	0.299772
GT_A_84_P825459		TA41239_3702	0.0149869	1.75415	0.264594
GT_A_84_P518108	AT2G39415	F-box family protein	0.0151295	1.44195	0.238452
GT_A_84_P797957	AT5G40380	AT5G40380.1	0.015207	1.19708	0.234126
GT_A_84_P837204		AT4G30560.1	0.0154916	1.64288	0.418056
GT_A_84_P817217		TA32971_3702	0.015757	1.28352	0.207827
GT_A_84_P828956		TA45631_3702	0.0158454	1.22887	0.323732
GT_A_84_P155385	AT4G17280	hypothetical protein	0.0158903	2.19709	0.361081
GT_A_84_P784927		AV565935	0.0160739	1.7331	0.236402
GT_A_84_P16206	AT1G21340	Dof-type zinc finger domain-containing protein	0.0161505	1.92903	0.180817
GT_A_84_P862978		BP656795	0.0163833	1.12077	0.207742
GT_A_84_P14479	AT2G40250	GDSL-motif lipase/hydrolase family protein	0.0164557	1.59424	0.331469
GT_At_Specific_00286822			0.0165377	2.05816	0.299772
GT_A_84_P840068		NP206666	0.0166438	1.8766	0.35611
GT_A_84_P10272	AT5G50490	NF-YC5 (NUCLEAR FACTOR Y, SUBUNIT C5); DNA binding / transcription factor	0.0168508	1.55199	0.180817
GT_A_84_P563250	AT2G26400	ATARD3 (ACIREDUCTONE DIOXYGENASE 3); acireductone dioxygenase [iron(II)-requiring]	0.0170408	1.63091	0.266988
GT_A_84_P817213		AT2G46370.1	0.0170766	1.28133	0.301625
GT_A_84_P22332	AT4G20235	CYP71A28; electron carrier/ heme binding / iron ion binding / monooxygenase	0.0171088	1.87055	0.440174
GT_A_84_P847681	AT3G08680	AT3G08680.2	0.0171349	1.42639	0.236467
GT_A_84_P588463			0.0173491	1.60202	0.155311
GT_A_84_P832082		TA49525_3702	0.0179876	1.1205	0.113342
GT_A_84_P791013	AT3G29580	AT3G29580.1	0.0183514	1.69545	0.360825
GT_A_84_P603397	AT2G42440	hypothetical protein	0.0186051	1.33597	0.419111
GT_A_84_P12429	AT1G63820	hypothetical protein	0.0187408	1.5519	0.151247
GT_A_84_P23485	AT5G43890	YUCCA5; monooxygenase	0.0187735	2.38624	0.241309
GT_A_84_P751997	AT1G15630	AT1G15630.1	0.0188758	1.81669	0.299772
GT_A_84_P542466	AT5G36800;AT5G36710	hypothetical protein	0.0190569	1.20254	0.438519
GT_A_84_P834551		TA51453_3702	0.0192469	1.82232	0.195409
GT_A_84_P572443	AT4G14103	F-box family protein	0.0192559	1.15681	0.245195
GT_A_84_P14339	AT1G35260	MLP165 (MLP-LIKE PROTEIN 165)	0.0194236	1.25267	0.379305
GT_A_84_P147108	AT2G29620	hypothetical protein	0.0195234	1.07459	0.155311
GT_A_84_P21929	AT1G77860	KOM (KOMPEITO)	0.0197076	1.13578	0.298482
GT_A_84_P20421	AT1G69560	MYB105 (myb domain protein 105); DNA binding / transcription factor	0.0201799	2.12824	0.194001
GT_A_84_P816743		TA32545_3702	0.0202293	1.46642	0.114754
GT_A_84_P790088		BE038835	0.0204615	1.53667	0.151247
GT_A_84_P768692	AT5G40348	AT5G40348.1	0.0206426	1.1666	0.33027
GT_A_84_P21390	AT4G21200	GA2OX8 (GIBBERELLIN 2-OXIDASE 8); gibberellin 2-beta-dioxygenase	0.0207877	1.9583	0.464976
GT_A_84_P842527	AT5G42800	NP240316	0.0210618	2.21233	0.299772
GT_A_84_P853269	AT4G34260	AT4G34260.1	0.0215012	1.69371	0.318226
GT_A_84_P557133	AT2G47340	invertase/pectin methylesterase inhibitor family protein	0.0216731	2.58421	0.413054
GT_A_84_P752697	AT1G64107	AT1G64107.1	0.0216748	1.89306	0.29286
GT_A_84_P856268		AT1G68410.2	0.0217371	1.9241	0.25526
GT_A_84_P153598	AT5G65165	SDH2-3; electron carrier/ succinate dehydrogenase	0.0218166	1.73482	0.207742
GT_A_84_P824563	AT4G12030	AT4G12030.1	0.0218701	1.08541	0.29286
GT_A_84_P16474	AT3G20460	sugar transporter, putative	0.0219329	1.00339	0.155411
GT_A_84_P19949	AT1G02940	GSTF5 (GLUTATHIONE S-TRANSFERASE (CLASS PHI) 5); glutathione transferase	0.0221891	1.34256	0.344548
GT_A_84_P17209	AT1G31690	amine oxidase/ copper ion binding / quinone binding	0.0224352	2.12446	0.444397
GT_At_Specific_00299208		AT5G55690	0.023293	1.03712	0.261286
GT_A_84_P596217	AT2G23830	vesicle-associated membrane protein, putative / VAMP, putative	0.0239761	1.41435	0.207742
GT_A_84_P826896	AT1G79450	AT1G79450.1	0.0239952	1.72416	0.151247
GT_A_84_P541510	AT5G10890	myosin heavy chain-related	0.0241081	1.06206	0.495972
GT_A_84_P839002	AT1G02250	AT1G02250.1	0.0242832	3.8978	0.393449
GT_At_Specific_00282720			0.024356	1.01323	0.367114
GT_A_84_P509353	AT3G28857	transcription regulator	0.0248362	1.87026	0.242998
GT_A_84_P187634	AT1G66470	basic helix-loop-helix (bHLH) family protein	0.0251495	1.59191	0.392683
GT_A_84_P834955	AT2G36380	AT2G36380.1	0.0253144	1.18877	0.207742
GT_A_84_P13496	AT2G25150	transferase family protein	0.0254229	1.26816	0.226801
GT_A_84_P797000	AT2G19780	AT2G19780.1	0.0256163	2.57256	0.40589
GT_A_84_P125591	AT4G21830	methionine sulfoxide reductase domain-containing protein	0.0256681	1.60006	0.213987
GT_A_84_P21272	AT3G50230	leucine-rich repeat transmembrane protein kinase, putative	0.0256942	1.03048	0.266146
GT_A_84_P854032	AT1G10060	AT1G10060.1	0.0261642	1.05119	0.264969
GT_A_84_P20780	AT1G03940;AT1G03495	transferase/ transferase, transferring acyl groups other than amino-acyl groups	0.0262944	3.32158	0.307693
GT_A_84_P18772	AT5G47990	CYP705A5; oxygen binding / thalian-diol desaturase	0.0270298	2.07436	0.299772
GT_A_84_P255730		GDSL-motif lipase, putative	0.0272306	1.42609	0.180817
GT_A_84_P13492	AT1G04760	ATVAMP726	0.0272981	1.52086	0.553566
GT_A_84_P830199	AT1G73930	AT1G73930.1	0.0273488	1.82216	0.308243
GT_A_84_P22692	AT1G17720	ATB BETA; nucleotide binding / protein phosphatase type 2A regulator	0.0273808	1.06895	0.151247
GT_A_84_P19160	AT2G14580	ATPRB1	0.0274711	2.45375	0.203166
GT_A_84_P22954	AT2G29380	protein phosphatase 2C, putative / PP2C, putative	0.0278976	2.91549	0.22999
GT_A_84_P17047	AT1G80730	ZFP1 (ZINC-FINGER PROTEIN 1); nucleic acid binding / transcription factor/ zinc ion binding	0.0283243	2.24595	0.23544
GT_A_84_P818327	AT1G51590	AT1G51590.2	0.0291937	1.08116	0.285007
GT_A_84_P838006	AT4G38170	AT4G38170.1	0.0303952	1.04772	0.33027
GT_A_84_P853377	AT5G07740	AT5G07740.1	0.0305769	1.0356	0.155411
GT_A_84_P16091	AT1G64590	short-chain dehydrogenase/reductase (SDR) family protein	0.0306208	1.89396	0.250631
GT_A_84_P551464	AT1G33280	ANAC015 (Arabidopsis NAC domain containing protein 15); transcription factor	0.0312853	1.79902	0.203166
GT_A_84_P141589	AT2G46300	hypothetical protein	0.0314945	1.22321	0.258804
GT_A_84_P18663	AT5G05340	peroxidase, putative	0.0316941	1.61494	0.558176
GT_A_84_P16839	AT5G36970	NHL25 (NDR1/HIN1-LIKE 25)	0.0318109	2.26173	0.380686
GT_A_84_P850577	AT2G34830	AT2G34830.1	0.0318817	1.21099	0.267315
GT_A_84_P597183	AT2G45900	hypothetical protein	0.0323103	1.21296	0.250906
GT_A_84_P14013	AT5G40000	AAA-type ATPase family protein	0.0327198	1.04473	0.34345
GT_A_84_P755290	AT2G44195	AT2G44195.1	0.0327459	1.16822	0.451279
GT_A_84_P518792	AT1G51405	myosin-related	0.0339058	1.0729	0.22999
GT_At_Specific_00086161		AT2G05910	0.0342124	1.96806	0.372636
GT_A_84_P789751	AT1G10060	AT1G10060.1	0.0344853	1.0845	0.299772
GT_A_84_P13493	AT2G30670	tropinone reductase, putative / tropine dehydrogenase, putative	0.0345804	2.47203	0.180817
GT_A_84_P20648	AT5G44120	CRA1 (CRUCIFERINA); nutrient reservoir	0.0346469	1.36153	0.363203
GT_A_84_P23079	AT3G18080	BGLU44 (B-S GLUCOSIDASE 44); (R)-amygdalin beta-glucosidase	0.0347913	1.29326	0.2059
GT_A_84_P550382	AT5G10440	CYCD4;2 (cyclin d4;2); cyclin-dependent protein kinase	0.0349205	1.143	0.56976
GT_A_84_P23867	AT1G63990	SPO11-2 (SPORULATION 11-2); ATP binding / DNA binding / DNA topoisomerase	0.0354151	2.07341	0.227298
GT_A_84_P760561	AT3G32377	AT3G32377.1	0.0364325	1.82427	0.170386
GT_A_84_P828620	AT1G29630	AT1G29630.2	0.0365656	1.7533	0.407922
GT_A_84_P602934	AT5G37010	hypothetical protein	0.0365693	1.00776	0.250906
GT_A_84_P855667	AT2G25760	AT2G25760.1	0.0366095	1.20287	0.294807
GT_A_84_P824704	AT2G47850	AT2G47850.1	0.0366293	1.03609	0.2059
GT_A_84_P752590	AT1G16410	AT1G16410.1	0.0371072	1.16154	0.159499
GT_A_84_P851667	AT3G23840	AY087838	0.0372028	1.56616	0.304447
GT_A_84_P767079	AT5G33990;AT5G34665	AT5G34665.1	0.0372579	1.11261	0.451279
GT_A_84_P851716	AT4G16430	AT4G16430.1	0.0375892	1.80425	0.299772
GT_A_84_P517600	AT5G15510	hypothetical protein	0.037837	1.00114	0.325435
GT_A_84_P21760	AT1G03940	transferase family protein	0.0378986	2.47073	0.25526
GT_A_84_P13124	AT5G55340	long-chain-alcohol O-fatty-acyltransferase family protein / wax synthase family protein	0.0380474	2.03057	0.331953
GT_A_84_P797932		EG476183	0.0383353	1.12702	0.447448
GT_A_84_P20360	AT1G21510	hypothetical protein	0.0387287	1.24978	0.363203
GT_A_84_P19618	AT1G68700	hypothetical protein	0.038852	1.25928	0.207742
GT_A_84_P851276	AT5G66510	AT5G66510.2	0.0396723	1.22721	0.231559
GT_A_84_P767772	AT5G39995	AT5G39995.1	0.039826	1.09991	0.36568
GT_A_84_P19128	AT2G46130	WRKY43; transcription factor	0.0399504	3.13122	0.255511
GT_A_84_P14780	AT4G24080	ALL1 (Aldolase like); carbon-carbon lyase/ catalytic	0.040394	1.52154	0.249404
GT_A_84_P758488	AT2G18969	AT2G18969.1	0.0408107	1.25088	0.418056
GT_A_84_P790886	AT1G69340	AT1G69340.1	0.041019	1.26621	0.318226
GT_A_84_P771113	AT1G59030;AT1G58725;AT1G59406	AT1G59030.1	0.041077	1.18282	0.113342
GT_A_84_P11650	AT1G07550	leucine-rich repeat protein kinase, putative	0.0411736	1.43983	0.386442
GT_A_84_P799229		CB253475	0.0412051	1.45059	0.365241
GT_A_84_P14630	AT3G45330	lectin protein kinase family protein	0.0416614	1.44526	0.207742
GT_A_84_P18955	AT1G30850	hypothetical protein	0.0418239	1.08928	0.307821
GT_A_84_P795497		CB254172	0.042719	1.32469	0.465994
GT_A_84_P50790	AT3G22620	protease inhibitor/seed storage/lipid transfer protein (LTP) family protein	0.0427389	2.31079	0.147745
GT_A_84_P12415	AT1G27660	ethylene-responsive protein -related	0.0429272	1.03943	0.207742
GT_A_84_P835211	AT3G12870	AT3G12870.1	0.0430235	1.03264	0.325662
GT_A_84_P13093	AT5G46670	CHP-rich zinc finger protein, putative	0.0430448	1.14443	0.113342
GT_A_84_P762136	AT3G32052	AT3G32052.1	0.043351	1.40848	0.181048
GT_A_84_P850710	AT1G66140	AT1G66140.1	0.0435742	1.49703	0.369045
GT_A_84_P835248	AT1G27660	AT1G27660.1	0.0439151	1.25884	0.40589
GT_A_84_P20306	AT3G45670	protein kinase-related	0.043952	1.33038	0.16235
GT_A_84_P290684	AT4G17490	ATERF6 (ETHYLENE RESPONSIVE ELEMENT BINDING FACTOR 6); DNA binding / transcription factor	0.0439589	1.03184	0.169096
GT_A_84_P12344	AT1G04110	SDD1 (STOMATAL DENSITY AND DISTRIBUTION); serine-type endopeptidase	0.044064	1.17393	0.331964
GT_A_84_P800898		T42248	0.0443218	1.92481	0.211185
GT_A_84_P515522	AT3G14395	hypothetical protein	0.0445426	1.46946	0.307821
GT_A_84_P19999	AT1G52770	phototropic-responsive NPH3 family protein	0.0449895	1.16838	0.283052
GT_A_84_P825133	AT1G64380	AT1G64380.1	0.0464235	1.37975	0.299772
GT_A_84_P12885	AT4G22880	LDOX (LEUCOANTHOCYANIDIN DIOXYGENASE); leucocyanidin oxygenase	0.0464951	2.87177	0.195409
GT_A_84_P841983	AT5G56120	NP231108	0.046691	1.24493	0.113342
GT_A_84_P108502	AT2G02120	PDF2.1; peptidase inhibitor	0.0470218	1.47486	0.237451
GT_A_84_P805176	AT3G61490	TA25855_3702	0.0471771	1.02667	0.203897
GT_A_84_P166073	AT2G45110	ATEXPB4 (ARABIDOPSIS THALIANA EXPANSIN B4)	0.0476236	2.39003	0.194001
GT_A_84_P868105	AT3G61490	AT3G61490.1	0.0476776	1.07109	0.302337
GT_A_84_P600892	AT3G54480	SKIP5 (SKP1/ASK-INTERACTING PROTEIN 5)	0.0477217	1.0294	0.169096
GT_A_84_P16269	AT1G32300	FAD-binding domain-containing protein	0.0484802	1.60129	0.331988
GT_A_84_P856511		H36698	0.0486186	1.0335	0.232967
GT_A_84_P833096	AT1G52320	AT1G52320.2	0.0486423	2.53811	0.2059
GT_A_84_P570015	AT5G57123	hypothetical protein	0.0487299	1.39509	0.370668
GT_A_84_P20664	AT5G48010	THAS1 (THALIANOL SYNTHASE 1); catalytic/ thalianol synthase	0.0491979	1.40687	0.221379
GT_A_84_P590155	AT3G42060	myosin heavy chain-related	0.0493863	4.29523	0.281855
GT_A_84_P559253	AT5G18210	short-chain dehydrogenase/reductase (SDR) family protein	0.0495722	1.78698	0.250906
GT_A_84_P512438	AT3G20710	F-box protein-related	0.0496866	1.34691	0.296318
GT_A_84_P836357	AT4G04990	AT4G04990.1	0.0497216	1.85936	0.250906
GT_A_84_P19119	AT2G24800	peroxidase, putative	0.0502184	2.0532	0.339951
GT_A_84_P547455	AT3G18485	ILR2 (IAA-LEUCINE RESISTANT 2)	0.0503515	1.00828	0.33027
GT_A_84_P828202		TA44663_3702	0.0505601	2.67685	0.407922
GT_A_84_P786357	AT5G18860	AT5G18860.1	0.0511676	1.12864	0.238654
GT_A_84_P797762	AT4G35170	AT4G35170.1	0.0516654	1.24007	0.194001
GT_A_84_P17194	AT1G70880	Bet v I allergen family protein	0.0520727	1.17998	0.209616
GT_A_84_P861913	AT1G64640	TC313662	0.0524144	1.02847	0.401736
GT_A_84_P585620	AT3G01513	hypothetical protein	0.052692	2.48747	0.137155
GT_A_84_P16901	AT5G54060	UF3GT (udp-glucose:flavonoid 3-O-glucosyltransferase); transferase	0.05277	3.16376	0.139072
GT_A_84_P19189	AT2G42960	protein kinase family protein	0.0527784	1.08501	0.207742
GT_A_84_P796549	AT3G06868	AT3G06868.1	0.0530599	1.24635	0.236402
GT_A_84_P720315			0.0531102	1.41263	0.304533
GT_A_84_P606916	AT2G30900;AT2G30890	hypothetical protein	0.0535366	1.23296	0.207827
GT_A_84_P809044		TA27856_3702	0.053649	1.02329	0.360503
GT_A_84_P753017	AT1G53163	AT1G53163.1	0.0541235	1.08532	0.155411
GT_A_84_P829642	AT1G30160	AT1G30160.2	0.0546832	1.06791	0.144922
GT_A_84_P15262	AT1G69820	GGT3 (GAMMA-GLUTAMYL TRANSPEPTIDASE 3); gamma-glutamyltransferase	0.0547182	1.23471	0.504251
GT_A_84_P862920		BP845828	0.0549405	2.03819	0.199886
GT_At_Specific_00032304		AT1G29540	0.0552365	1.97307	0.299772
GT_A_84_P752264	AT1G67035	AT1G67035.1	0.0552724	1.38902	0.267315
GT_A_84_P251495	AT3G02640	hypothetical protein	0.0553158	1.47181	0.118043
GT_A_84_P18380	AT1G12950	MATE efflux family protein	0.0556759	1.07084	0.449993
GT_A_84_P584775	AT3G15550	hypothetical protein	0.0559762	1.83089	0.112973
GT_A_84_P833963	AT3G11850	AT3G11850.1	0.0560108	1.27244	0.24952
GT_A_84_P20603	AT5G23990	FRO5 (FERRIC REDUCTION OXIDASE 5); ferric-chelate reductase	0.0561407	1.28293	0.195409
GT_A_84_P18312	AT3G02020	AK3 (ASPARTATE KINASE 3); aspartate kinase	0.056341	1.23407	0.251697
GT_A_84_P17720	AT5G06150	CYC1BAT; cyclin-dependent protein kinase regulator	0.0565809	1.08948	0.191624
GT_A_84_P15632	AT3G58390	eukaryotic release factor 1 family protein / eRF1 family protein	0.0567073	1.31642	0.250906
GT_A_84_P847999	AT5G34940	AT5G34940.1	0.0569432	1.0508	0.454581
GT_A_84_P836806		TA52627_3702	0.0571105	1.35182	0.360503
GT_A_84_P13572	AT3G01260	aldose 1-epimerase/ carbohydrate binding / catalytic/ isomerase	0.0573837	1.46633	0.155411
GT_A_84_P197194	AT4G22870	leucoanthocyanidin dioxygenase, putative / anthocyanidin synthase, putative	0.0573955	2.73033	0.451283
GT_A_84_P14016	AT5G40560	DegP13 (DegP protease 13); catalytic/ protein binding / serine-type endopeptidase	0.0576292	1.97118	0.250906
GT_A_84_P604776	AT5G56120	hypothetical protein	0.0579659	1.18566	0.144922
GT_A_84_P848224		BX839205	0.0581536	1.19655	0.247348
GT_A_84_P15532	AT3G14450	CID9 (CTC-Interacting Domain 9); RNA binding / protein binding	0.0583462	1.58384	0.273511
GT_At_Specific_00134691		AT3G03456	0.0584487	1.25738	0.207742
GT_A_84_P19843	AT1G71490	pentatricopeptide (PPR) repeat-containing protein	0.0585243	1.79582	0.234892
GT_A_84_P241489	AT4G24130	hypothetical protein	0.0588077	1.48367	0.185575
GT_A_84_P590512	AT5G53660	AtGRF7 (GROWTH-REGULATING FACTOR 7); transcription activator	0.058813	1.42404	0.203166
GT_A_84_P291814	AT1G67030	ZFP6 (ZINC FINGER PROTEIN 6); nucleic acid binding / transcription factor/ zinc ion binding	0.0601711	1.23938	0.565765
GT_A_84_P13936	AT5G05810	ATL43; protein binding / zinc ion binding	0.0603322	1.25918	0.166349
GT_A_84_P584003	AT4G00690	ULP1B (UB-LIKE PROTEASE 1B); cysteine-type peptidase	0.0609507	1.17532	0.336892
GT_A_84_P806297	AT4G18670	AT4G18670.1	0.0613713	1.01096	0.299772
GT_A_84_P792933		BE522041	0.0616565	1.73028	0.298845
GT_A_84_P19619	AT5G07700	MYB76 (myb domain protein 76); DNA binding / transcription factor	0.0618612	1.53258	0.346836
GT_A_84_P18858	AT5G19870	hypothetical protein	0.0618856	1.48779	0.372636
GT_A_84_P831079		TA48622_3702	0.0620978	1.81229	0.169096
GT_A_84_P24141	AT3G57140	patatin-related	0.0633619	1.21438	0.350213
GT_A_84_P13002	AT5G08260	scpl35 (serine carboxypeptidase-like 35); serine-type carboxypeptidase	0.0637474	1.01641	0.24952
GT_A_84_P23497	AT5G46880	HB-7 (HOMEOBOX-7); DNA binding / transcription factor	0.0637981	1.12149	0.372636
GT_A_84_P838477		NP032020	0.0640293	1.88844	0.155411
GT_A_84_P550387	AT5G13250	hypothetical protein	0.0640452	1.48252	0.320781
GT_A_84_P558998	AT3G42800	hypothetical protein	0.0642842	1.32243	0.369203
GT_A_84_P716628		GMD1 (GDP-D-MANNOSE 4,6-DEHYDRATASE 1); GDP-mannose 4,6-dehydratase	0.0644233	1.10222	0.264594
GT_A_84_P15745	AT4G28110	AtMYB41 (myb domain protein 41); DNA binding / transcription factor	0.0645894	3.0234	0.379603
GT_A_84_P835759	AT2G22125	AT2G22125.1	0.0650235	1.15911	0.414156
GT_At_Specific_00081272		AT2G01510	0.0658554	1.00869	0.191624
GT_A_84_P13705	AT3G49950	scarecrow transcription factor family protein	0.0659224	2.82534	0.113342
GT_A_84_P847349	AT4G26790	AT4G26790.1	0.0666584	1.3021	0.308243
GT_At_Specific_00000237			0.0669604	2.4687	0.113342
GT_A_84_P23095	AT3G20360	meprin and TRAF homology domain-containing protein / MATH domain-containing protein	0.0675171	1.52508	0.134982
GT_A_84_P11895	AT4G05310	ubiquitin family protein	0.0678631	2.7461	0.298845
GT_A_84_P857567	AT4G30170	AT4G30170.1	0.0683594	1.21724	0.155311
GT_A_84_P855617	AT5G20630	AT5G20630.1	0.0686997	1.94794	0.339951
GT_A_84_P587549	AT3G60470	hypothetical protein	0.0698165	2.28685	0.238452
GT_At_Specific_00297550			0.0699511	1.26267	0.393012
GT_A_84_P10804	AT1G26770	ATEXPA10 (ARABIDOPSIS THALIANA EXPANSIN A 10); structural constituent of cell wall	0.069983	1.31094	0.299772
GT_A_84_P13041	AT5G24960	CYP71A14; electron carrier/ heme binding / iron ion binding / oxygen binding	0.0703613	1.85526	0.297604
GT_A_84_P602945	AT5G40860	hypothetical protein	0.0704243	2.61688	0.33027
GT_A_84_P804445	AT3G44760	AT3G44760.1	0.0707327	1.98258	0.151247
GT_A_84_P507058	AT5G57760	hypothetical protein	0.0707912	1.05269	0.347276
GT_A_84_P19283	AT3G17290		0.0710668	1.71598	0.296318
GT_At_Specific_00117129		AT2G36030	0.0718986	1.08095	0.249404
GT_A_84_P16974	AT5G20630	GER3 (GERMIN 3); oxalate oxidase	0.0722803	1.40429	0.421585
GT_A_84_P808136		TA27368_3702	0.072394	1.63925	0.234126
GT_A_84_P156385	AT5G66230	hypothetical protein	0.0725943	1.12775	0.169096
GT_At_Specific_00256424		AT5G14230	0.0750697	1.14996	0.449993
GT_A_84_P840752	AT1G34460	AT1G34460.1	0.0758478	1.21099	0.298798
GT_At_Specific_00118768		AT2G37390	0.0759619	1.12054	0.399973
GT_A_84_P12272	AT2G04025	hypothetical protein	0.0761046	1.31207	0.169436
GT_A_84_P13626	AT3G20840	PLT1 (PLETHORA 1); transcription factor	0.0762111	2.70796	0.22999
GT_A_84_P857601		TC311129	0.0767302	1.431	0.322278
GT_A_84_P761609	AT3G18845	AT3G18845.1	0.0771105	1.53809	0.395882
GT_A_84_P844375	AT4G15340	TC281545	0.0772122	1.14862	0.267315
GT_A_84_P795819		DQ108857	0.0772999	1.12014	0.185575
GT_A_84_P786039	AT3G49130	AT3G49130.1	0.0773239	1.13494	0.412956
GT_A_84_P16270	AT1G33612	protein binding	0.0773908	1.40014	0.220662
GT_A_84_P815612	AT3G18080	AT3G18080.1	0.0776001	1.14919	0.264969
GT_A_84_P757112	AT2G16676	AT2G16676.1	0.0777984	2.09308	0.331253
GT_A_84_P19179	AT2G26180	IQD6 (IQ-domain 6); calmodulin binding	0.078124	1.04245	0.282502
GT_A_84_P16784	AT5G08490	pentatricopeptide (PPR) repeat-containing protein	0.0784931	1.07074	0.282502
GT_A_84_P806777	AT1G12090	AT1G12090.1	0.0784973	1.01419	0.258804
GT_A_84_P23025	AT2G46780	RNA binding / nucleic acid binding / nucleotide binding	0.0789064	1.11121	0.301074
GT_A_84_P798714	AT3G01930	AT3G01930.1	0.0791155	1.10883	0.258804
GT_A_84_P17806	AT5G42800	DFR (DIHYDROFLAVONOL 4-REDUCTASE); dihydrokaempferol 4-reductase	0.079709	2.46898	0.292711
GT_A_84_P758014	AT2G27150	AT2G27150.2	0.0798972	1.31078	0.401736
GT_A_84_P13558	AT2G03410	Mo25 family protein	0.0799729	1.20057	0.238452
GT_A_84_P13657	AT3G29590	AT5MAT; O-malonyltransferase/ transferase	0.0804927	2.89304	0.395882
GT_At_Specific_00174919		AT3G46616	0.0809509	1.1117	0.279494
GT_A_84_P788106	AT2G37390	AT2G37390.1	0.0813871	1.21132	0.155311
GT_A_84_P22675	AT1G30760	FAD-binding domain-containing protein	0.0814426	1.19553	0.214958
GT_A_84_P13562	AT2G22930	glycosyltransferase family protein	0.0814832	1.48532	0.301625
GT_A_84_P830941	AT1G74000	AT1G74000.1	0.0818268	1.51117	0.113342
GT_A_84_P770289	ATMG01040;AT2G07664	ATMG01040.1	0.081846	1.20056	0.425063
GT_A_84_P594936	AT5G45340	CYP707A3; (+)-abscisic acid 8'-hydroxylase/ oxygen binding	0.0825609	1.99205	0.29286
GT_A_84_P535977	AT3G43870	hypothetical protein	0.0831558	1.18097	0.304533
GT_A_84_P20613	AT5G27000	ATK4 (ARABIDOPSIS THALIANA KINESIN 4); ATPase / microtubule motor	0.0833203	1.17772	0.453718
GT_A_84_P825596	AT1G15570	AT1G15570.1	0.0834398	1.20131	0.389801
GT_A_84_P13781	AT1G23340	hypothetical protein	0.0835531	1.09806	0.372636
GT_A_84_P23848	AT2G25060	plastocyanin-like domain-containing protein	0.0840317	1.15453	0.341186
GT_A_84_P817510		AT3G54920.1	0.0840853	1.08341	0.234892
GT_At_Specific_00085151		AT2G04864	0.0843201	1.21134	0.420397
GT_A_84_P23972	AT2G23630	sks16 (SKU5 Similar 16); copper ion binding / pectinesterase	0.0851992	1.6022	0.318226
GT_A_84_P575490	AT1G19394	hypothetical protein	0.0859263	1.35825	0.189529
GT_A_84_P13969	AT5G17220	ATGSTF12 (ARABIDOPSIS THALIANA GLUTATHIONE S-TRANSFERASE PHI 12)	0.0859876	1.77818	0.234892
GT_A_84_P12585	AT2G37670	WD-40 repeat family protein	0.0864611	1.51726	0.290171
GT_A_84_P834994	AT2G15530	AT2G15530.3	0.0864874	1.89316	0.513143
GT_A_84_P789543	AT5G57760	AT5G57760.1	0.0872155	1.02708	0.209616
GT_A_84_P14280	AT1G08290	zinc finger (C2H2 type) protein (WIP3)	0.0876048	1.48123	0.207827
GT_A_84_P16314	AT2G22590	transferase, transferring glycosyl groups	0.0876798	1.14818	0.264594
GT_A_84_P19804	AT5G19880	peroxidase, putative	0.087769	2.04644	0.367867
GT_A_84_P763936	AT4G11945;AT4G11950	AT4G11945.1	0.0878785	1.53211	0.486386
GT_A_84_P11313	AT2G17330		0.088151	1.08561	0.578319
GT_A_84_P854756	AT1G17620	AT1G17620.1	0.0886789	1.24254	0.267377
GT_A_84_P860349	AT5G12330	AT5G12330.3	0.0889751	1.68545	0.207742
GT_A_84_P852147		AT1G31850.1	0.08908	1.63373	0.113342
GT_A_84_P19115	AT2G43590	chitinase, putative	0.0893002	1.15608	0.169096
GT_A_84_P13778	AT4G03060		0.0901225	1.74249	0.451279
GT_At_Specific_00289637		AT5G47500	0.090167	1.20667	0.310654
GT_A_84_P792341	AT1G65710	AT1G65710.1	0.0906306	1.24847	0.511754
GT_A_84_P123602	AT3G59570	RabGAP/TBC domain-containing protein	0.0911741	1.01295	0.267127
GT_A_84_P13497	AT2G45580	CYP76C3; electron carrier/ heme binding / iron ion binding / monooxygenase	0.0915748	1.19903	0.298845
GT_A_84_P21947	AT1G44110	CYCA1;1 (Cyclin A1;1); cyclin-dependent protein kinase regulator	0.091933	1.17257	0.195409
GT_A_84_P814458	AT1G72970	AT1G72970.1	0.0921461	1.03193	0.207827
GT_A_84_P793020	AT3G03450	AT3G03450.1	0.0924662	1.54691	0.335283
GT_A_84_P842536	AT1G28620	AT1G28620.1	0.0928843	2.12388	0.454581
GT_A_84_P800063		BT025689	0.0930622	1.16356	0.560091
GT_A_84_P23434	AT5G19040	IPT5; ATP binding / tRNA isopentenyltransferase/ transferase	0.093296	1.175	0.113342
GT_A_84_P816710	AT2G42570	AT2G42570.1	0.0936834	1.65457	0.3384
GT_A_84_P814607	AT4G37410	AT4G37410.1	0.0938931	1.44723	0.436963
GT_A_84_P793525		AI997838	0.0939724	1.44377	0.12666
GT_A_84_P19581	AT4G15200	actin binding	0.0940385	1.97066	0.40589
GT_A_84_P820887	AT3G53190	AT3G53190.1	0.0946729	1.83401	0.286489
GT_A_84_P787694	AT1G79450	AT1G79450.1	0.0948039	1.36994	0.264969
GT_A_84_P822097	AT3G15030	AT3G15030.2	0.0949671	1.10164	0.134982
GT_A_84_P852973		AT5G23830.1	0.0950489	1.20911	0.249404
GT_A_84_P804883	AT1G04990	AT1G04990.2	0.0950603	1.36733	0.35611
GT_At_Specific_00117814			0.0955088	1.26166	0.339951
GT_A_84_P12882	AT4G22020		0.0955419	1.70401	0.226668
GT_A_84_P837342		TA52963_3702	0.0956538	1.10304	0.264594
GT_A_84_P804935		TA25744_3702	0.0975122	3.9636	0.566091
GT_A_84_P14482	AT2G24560	carboxylesterase/ hydrolase, acting on ester bonds	0.0977275	1.16334	0.195409
GT_A_84_P756613	AT2G10080	AT2G10080.1	0.0979359	1.75313	0.125912
GT_A_84_P10080	AT4G29610	cytidine deaminase, putative / cytidine aminohydrolase, putative	0.0980566	2.49654	0.16235
GT_At_Specific_00283867			0.0991507	2.32208	0.39606
GT_A_84_P847244	AT2G36610	AT2G36610.1	0.0991521	1.79294	0.449993
GT_A_84_P761971	AT3G26934	AT3G26934.1	0.0992485	1.6808	0.203166
GT_A_84_P156185	AT3G25830;AT3G25820	ATTPS-CIN (terpene synthase-like sequence-1,8-cineole); (E)-beta-ocimene synthase	0.0993101	1.09902	0.139072
GT_A_84_P14634	AT3G46190	meprin and TRAF homology domain-containing protein / MATH domain-containing protein	0.100081	2.12469	0.325973
GT_A_84_P800082		EG425290	0.100493	1.24497	0.376823
GT_A_84_P762507	AT3G25573	AT3G25573.1	0.101072	1.22279	0.437708
GT_A_84_P861900		TC313658	0.101368	1.03345	0.339951
GT_A_84_P828854		AT4G33130.3	0.102566	1.31585	0.195409
GT_A_84_P20551	AT5G03860	MLS (MALATE SYNTHASE); malate synthase	0.10257	1.29443	0.271311
GT_A_84_P583961	AT3G51340	aspartic-type endopeptidase	0.102654	1.12646	0.192108
GT_A_84_P815336		TA31520_3702	0.103095	1.15265	0.151247
GT_A_84_P22554	AT5G47640	NF-YB2 (NUCLEAR FACTOR Y, SUBUNIT B2); transcription factor	0.103468	1.21595	0.185575
GT_A_84_P17940	AT2G20825	ULT2 (ULTRAPETALA 2); DNA binding	0.103661	1.20142	0.251697
GT_A_84_P845117		TC287985	0.104725	1.20899	0.302663
GT_A_84_P503581	AT3G14880	hypothetical protein	0.10474	1.84234	0.301625
GT_A_84_P610364	AT1G72490	hypothetical protein	0.105359	2.45417	0.113342
GT_A_84_P818622	AT3G22600	AT3G22600.1	0.105577	2.6168	0.366414
GT_A_84_P548594	AT5G05840	hypothetical protein	0.106069	1.5002	0.318226
GT_A_84_P828648	AT2G34020	AT2G34020.1	0.106126	1.27107	0.250906
GT_A_84_P13454	AT2G15780	glycine-rich protein	0.106205	1.5479	0.411712
GT_A_84_P21294	AT3G55090	ATPase, coupled to transmembrane movement of substances	0.106795	1.64464	0.250906
GT_At_Specific_00073612		AT1G74750	0.107162	1.22407	0.234892
GT_A_84_P20255	AT1G26700	MLO14 (MILDEW RESISTANCE LOCUS O 14); calmodulin binding	0.10724	1.23299	0.25964
GT_A_84_P16493	AT3G22600	protease inhibitor/seed storage/lipid transfer protein (LTP) family protein	0.107682	2.49425	0.112973
GT_A_84_P842660	AT3G61510;AT5G28360	AT5G28360.1	0.107779	1.29333	0.16235
GT_A_84_P826231		AT4G14200.1	0.107852	1.35178	0.501611
GT_A_84_P755918	AT2G34020	AT2G34020.1	0.108224	1.16754	0.155311
GT_A_84_P19378	AT3G49830	DNA helicase-related	0.108659	1.2066	0.37837
GT_A_84_P767658	AT5G55420	AT5G55420.1	0.109562	1.66055	0.296318
GT_A_84_P867371	AT5G25090	AT5G25090.1	0.10964	1.34639	0.0853358
GT_A_84_P20361	AT3G57920	SPL15 (SQUAMOSA PROMOTER BINDING PROTEIN-LIKE 15); transcription factor	0.109821	1.33483	0.203897
GT_A_84_P611855	AT5G46915	transcriptional factor B3 family protein	0.10985	1.3325	0.24952
GT_A_84_P19329	AT3G13540	ATMYB5 (MYB DOMAIN PROTEIN 5); DNA binding / transcription factor	0.11035	1.13835	0.296427
GT_A_84_P786411	AT4G03060	AT4G03060.1	0.110939	1.91388	0.113342
GT_A_84_P828958	AT1G66340	AT1G66340.1	0.111374	1.46986	0.185575
GT_A_84_P17163	AT1G73160	glycosyl transferase family 1 protein	0.11148	1.48756	0.213987
GT_A_84_P527222	AT4G17140	hypothetical protein	0.111901	1.04334	0.112973
GT_A_84_P16769	AT5G04630	CYP77A9; electron carrier/ heme binding / iron ion binding / oxygen binding	0.112225	1.18761	0.636553
GT_A_84_P707814			0.112728	2.22834	0.180817
GT_A_84_P73044	AT2G41660	MIZ1 (mizu-kussei 1)	0.112856	1.15046	0.347276
GT_A_84_P836527		AT5G20870.1	0.11352	1.94956	0.325957
GT_A_84_P20522	AT4G39950	CYP79B2; electron carrier/ heme binding / iron ion binding / oxygen binding	0.11395	1.05526	0.446171
GT_A_84_P789883	AT1G25570	AT1G25570.1	0.114072	1.03645	0.113342
GT_A_84_P12771	AT3G52510	hypothetical protein	0.114137	1.39827	0.155411
GT_A_84_P814282	AT1G04220	AT1G04220.1	0.114142	1.18716	0.26127
GT_A_84_P572184	AT2G35200	hypothetical protein	0.114453	1.22606	0.214958
GT_A_84_P534084			0.114515	1.39186	0.203166
GT_A_84_P11606	AT2G29480	ATGSTU2 (ARABIDOPSIS THALIANA GLUTATHIONE S-TRANSFERASE TAU 2)	0.115001	1.49178	0.33027
GT_A_84_P804109		BP654619	0.115005	1.32018	0.304533
GT_A_84_P755708	AT2G40350	AT2G40350.1	0.11514	1.10336	0.113342
GT_A_84_P838503	AT1G50330	AT1G50330.1	0.115154	3.46957	0.36568
GT_A_84_P848781	AT1G71990	AT1G71990.1	0.115257	1.03224	0.318226
GT_A_84_P519409	AT5G40140	armadillo/beta-catenin repeat family protein / U-box domain-containing protein	0.116379	1.95901	0.25518
GT_A_84_P816154		AT5G34850.1	0.11677	1.7028	0.411603
GT_A_84_P20327	AT3G50400	GDSL-motif lipase/hydrolase family protein	0.116907	2.34406	0.151247
GT_At_Specific_00281420		AT5G40860	0.117511	2.22009	0.379603
GT_A_84_P561754	AT4G10700	hypothetical protein	0.118096	1.69229	0.283671
GT_A_84_P17817	AT5G45810	CIPK19 (CBL-INTERACTING PROTEIN KINASE 19); ATP binding / kinase/ protein kinase	0.118326	1.29158	0.258804
GT_A_84_P17445	AT3G20940	CYP705A30; electron carrier/ heme binding / iron ion binding / monooxygenase	0.118762	1.46503	0.477209
GT_A_84_P593798	AT3G61660	hypothetical protein	0.119395	1.21259	0.203166
GT_A_84_P832874	AT2G14520	AT2G14520.1	0.119553	1.58213	0.264594
GT_A_84_P839623	AT1G21980	AT1G21980.1	0.119835	1.27017	0.395882
GT_A_84_P10283	AT5G53990	glycosyltransferase family protein	0.119846	1.77203	0.250906
GT_A_84_P15120	AT1G33840	hypothetical protein	0.120421	1.22426	0.155311
GT_A_84_P801401	AT5G52510	AT5G52510.1	0.120455	1.15551	0.495177
GT_A_84_P23376	AT4G36880	CP1 (CYSTEINE PROTEINASE1); cysteine-type endopeptidase/ cysteine-type peptidase	0.122338	1.41361	0.306787
GT_A_84_P86749	AT2G11462	hypothetical protein	0.122662	3.23828	0.446312
GT_A_84_P23247	AT4G08570	heavy-metal-associated domain-containing protein / copper chaperone (CCH)-related	0.122777	1.59196	0.279494
GT_A_84_P583210	AT4G33550	lipid binding	0.12302	1.40748	0.40589
GT_A_84_P838698	AT1G20925	AT1G20925.1	0.123098	1.25167	0.234892
GT_A_84_P568577	AT2G26120	glycine-rich protein	0.123608	1.73175	0.112973
GT_A_84_P835765	AT4G21530	AT4G21530.1	0.123826	1.12412	0.267994
GT_A_84_P87749	AT5G27570	WD-40 repeat family protein	0.124178	1.42803	0.294807
GT_A_84_P16645	AT4G13480	AtMYB79 (myb domain protein 79); DNA binding / transcription factor	0.124698	2.03113	0.449993
GT_A_84_P753967	AT1G62301	AT1G62301.1	0.124941	2.78534	0.347009
GT_A_84_P12243	AT5G19270	hypothetical protein	0.125328	2.60363	0.438446
GT_A_84_P859050		TC311955	0.125572	1.85469	0.265202
GT_A_84_P536324	AT5G52730	heavy-metal-associated domain-containing protein	0.125661	2.52427	0.271557
GT_At_Specific_00306369		AT5G61890	0.127016	1.55827	0.259038
GT_A_84_P609134	AT5G37000	exostosin family protein	0.127261	1.37767	0.246668
GT_A_84_P12179	AT5G55330	membrane bound O-acyl transferase (MBOAT) family protein / wax synthase-related	0.127642	3.90971	0.211185
GT_A_84_P810242	AT3G09260	AT3G09260.1	0.128113	1.01374	0.299772
GT_A_84_P768073	AT5G51845	AT5G51845.1	0.128453	1.78886	0.207742
GT_A_84_P737765			0.128768	1.13782	0.2059
GT_A_84_P558306	AT5G01910	hypothetical protein	0.12882	1.15678	0.221379
GT_A_84_P15509	AT3G17998;AT3G18000	CPuORF30 (Conserved peptide upstream open reading frame 30)	0.129287	1.61967	0.151247
GT_At_Specific_00109643		AT2G29910	0.129314	1.26186	0.547292
GT_A_84_P754850	AT1G61093	AT1G61093.1	0.130125	1.3736	0.203364
GT_A_84_P822511	AT1G75140	AT1G75140.1	0.130385	1.38731	0.207827
GT_A_84_P840278	AT3G59190	AT3G59190.1	0.131154	2.17401	0.367114
GT_A_84_P827592	AT2G39830	AT2G39830.1	0.131459	1.03666	0.283052
GT_A_84_P11556			0.132395	1.95683	0.318642
GT_A_84_P795159		BP639281	0.132568	1.53555	0.113342
GT_A_84_P796648		EG419397	0.133643	1.2084	0.254394
GT_A_84_P11752	AT3G30210	MYB121 (MYB DOMAIN PROTEIN 121); DNA binding / transcription factor	0.133696	1.66587	0.234688
GT_A_84_P722866			0.13375	1.19645	0.29286
GT_A_84_P243155	AT5G23830	MD-2-related lipid recognition domain-containing protein / ML domain-containing protein	0.133777	1.36149	0.302337
GT_A_84_P799394	AT3G19680	AT3G19680.1	0.134069	1.2494	0.16235
GT_A_84_P21605	AT5G46830	basic helix-loop-helix (bHLH) family protein	0.134231	1.09107	0.184557
GT_A_84_P507386	AT2G19020	RALFL10 (ralf-like 10); signal transducer	0.134512	2.10347	0.299772
GT_A_84_P13764	AT3G44830	lecithin:cholesterol acyltransferase family protein / LACT family protein	0.134736	1.37705	0.267315
GT_A_84_P803729		EG488675	0.134806	1.3938	0.199886
GT_At_Specific_00159109			0.135366	1.43203	0.267127
GT_A_84_P768708	AT5G01215	AT5G01215.1	0.135426	1.39552	0.510588
GT_A_84_P23137	AT3G43690		0.136578	1.02869	0.450519
GT_A_84_P501421	AT3G60670	zinc-binding protein, putative	0.136652	1.46078	0.191394
GT_A_84_P798300	AT1G43620	AT1G43620.1	0.136657	1.19608	0.221379
GT_A_84_P582409	AT5G23800	agenet domain-containing protein	0.137118	1.95198	0.299772
GT_A_84_P842591	AT1G62910	AT1G62910.1	0.137164	1.01532	0.155311
GT_A_84_P570783	AT5G10100	trehalose-6-phosphate phosphatase, putative	0.137426	1.38096	0.419251
GT_A_84_P738964	AT3G63445	miscRNA	0.137591	1.13001	0.207827
GT_A_84_P15801		carboxylesterase/ hydrolase, acting on ester bonds	0.137627	1.70925	0.360503
GT_A_84_P15790	AT4G39260	GR-RBP8; RNA binding / nucleic acid binding / nucleotide binding	0.138853	1.58972	0.29286
GT_A_84_P278110	AT2G24870	self-incompatibility protein-related	0.13896	1.25229	0.207742
GT_A_84_P601063	AT5G05940	ROPGEF5 (Rho guanyl-nucleotide exchange factor)	0.139049	1.0504	0.443466
GT_A_84_P823856	AT5G15330	AT5G15330.1	0.139052	1.48061	0.347009
GT_A_84_P14193	AT1G03790	SOM (SOMNUS); nucleic acid binding / transcription factor	0.139177	1.26218	0.411603
GT_A_84_P834773	AT5G15580	AT5G15580.1	0.140087	1.53401	0.260534
GT_A_84_P762944	AT4G15215	AT4G15215.1	0.140106	1.55013	0.329251
GT_A_84_P10551	AT1G76310	CYCB2;4 (CYCLIN B2;4); cyclin-dependent protein kinase regulator	0.140305	1.10001	0.249404
GT_A_84_P11173	AT5G38550	jacalin lectin family protein	0.140797	1.28128	0.250906
GT_A_84_P790958		AK229737	0.141567	1.28187	0.286489
GT_A_84_P80959	AT1G53790	F-box family protein	0.141815	1.42581	0.250906
GT_A_84_P59930	AT1G15150	MATE efflux family protein	0.141974	2.23811	0.299772
GT_A_84_P16736	AT4G39270	leucine-rich repeat transmembrane protein kinase, putative	0.142487	1.20949	0.211185
GT_A_84_P200714	AT5G10580	hypothetical protein	0.142569	1.20023	0.347276
GT_A_84_P577829	AT4G28170	hypothetical protein	0.14327	1.44796	0.124356
GT_A_84_P846825		TC298035	0.143619	1.08462	0.2059
GT_A_84_P859993	AT1G80790	AT1G80790.1	0.144182	1.77067	0.264594
GT_A_84_P250485	AT2G21400	SRS3 (SHI-RELATED SEQUENCE3)	0.144633	1.40377	0.112973
GT_A_84_P23073	AT3G26790	FUS3 (FUSCA 3); DNA binding / transcription activator/ transcription factor	0.14469	1.3935	0.250906
GT_A_84_P762787	AT3G15534	AT3G15534.1	0.14508	1.06753	0.301074
GT_At_Specific_00079685			0.147689	1.2596	0.305541
GT_A_84_P833401	AT5G57240	AT5G57240.2	0.14781	1.14105	0.262146
GT_A_84_P582630	AT1G20720	ATP binding / ATP-dependent DNA helicase/ ATP-dependent helicase/ DNA binding	0.14789	1.13478	0.264594
GT_A_84_P516247	AT2G04480	hypothetical protein	0.147919	5.05008	0.284665
GT_A_84_P840606	AT1G19394	NP221601	0.14921	1.70402	0.372636
GT_A_84_P20594	AT5G18560	PUCHI; DNA binding / transcription factor	0.149411	1.30357	0.155311
GT_A_84_P848876	AT3G44326	AT3G44326.1	0.151054	1.7433	0.207742
GT_A_84_P804167	AT5G26000	AT5G26000.1	0.152311	1.11082	0.191394
GT_A_84_P798395	AT1G59865	EG495537	0.153373	1.25661	0.431204
GT_A_84_P794774		BP579870	0.153654	1.13907	0.155411
GT_A_84_P11727	AT3G15670	late embryogenesis abundant protein, putative / LEA protein, putative	0.153798	2.30497	0.3384
GT_A_84_P831424	AT1G55820	AT1G55820.1	0.154758	1.6567	0.207742
GT_A_84_P574406	AT5G39240	hypothetical protein	0.15513	1.18529	0.360503
GT_A_84_P23476	AT5G41040	transferase family protein	0.15582	1.83787	0.302337
GT_A_84_P834607	AT3G63510	AT3G63510.1	0.155886	1.08739	0.359229
GT_A_84_P11569	AT2G40610	ATEXPA8 (ARABIDOPSIS THALIANA EXPANSIN A8)	0.155948	1.27601	0.30324
GT_A_84_P762560	AT3G06962	AT3G06962.1	0.156535	1.01343	0.259038
GT_A_84_P23220	AT3G63380	calcium-transporting ATPase, plasma membrane-type, putative / Ca(2+)-ATPase	0.157372	1.03339	0.290171
GT_A_84_P19297	AT3G25980	mitotic spindle checkpoint protein, putative (MAD2)	0.157378	1.13083	0.112973
GT_A_84_P795693		AK222207	0.157501	1.48018	0.262146
GT_A_84_P23229	AT4G01520	anac067 (Arabidopsis NAC domain containing protein 67); transcription factor	0.158004	1.29618	0.185575
GT_A_84_P791730	AT4G16230	AT4G16230.1	0.158026	1.37839	0.250906
GT_A_84_P822774	AT3G50210	AT3G50210.2	0.158454	1.09728	0.297604
GT_A_84_P830265	AT1G47860	AT1G47860.1	0.159934	1.08189	0.112973
GT_A_84_P805404		TA25979_3702	0.160433	1.57992	0.24952
GT_A_84_P12140	AT5G44700	GSO2 (GASSHO 2); ATP binding / protein binding / protein kinase	0.160841	1.5877	0.282502
GT_A_84_P568309	AT1G11490	zinc finger (C2H2 type) family protein	0.161487	1.54943	0.353273
GT_A_84_P756101	AT2G04260	AT2G04260.1	0.161805	1.27142	0.322278
GT_A_84_P590991	AT3G12460	3'-5' exonuclease/ nucleic acid binding	0.162361	1.10015	0.113342
GT_A_84_P74244			0.162868	1.54808	0.240988
GT_At_Specific_00309571			0.163154	1.30193	0.22999
GT_A_84_P808742	AT4G29030	AT4G29030.1	0.163805	1.37779	0.310654
GT_A_84_P18920	AT1G62580	flavin-containing monooxygenase family protein / FMO family protein	0.164115	1.21539	0.233367
GT_A_84_P16385	AT2G35740	INT3 (NOSITOL TRANSPORTER 3); carbohydrate transmembrane transporter	0.165206	1.0886	0.307821
GT_A_84_P818485		TA34005_3702	0.165379	1.04971	0.399443
GT_A_84_P613041	AT1G77650	F-box family protein	0.166327	1.39657	0.194001
GT_A_84_P310253	AT5G45690	hypothetical protein	0.166622	1.46016	0.113342
GT_A_84_P24057	AT3G19620	glycosyl hydrolase family 3 protein	0.167138	1.26476	0.144922
GT_A_84_P754698	AT1G78922	AT1G78922.1	0.168645	1.44567	0.191394
GT_A_84_P233899	AT5G66780	hypothetical protein	0.169103	1.24652	0.434583
GT_A_84_P826039	AT2G29525	AT2G29525.1	0.169801	1.04581	0.22999
GT_A_84_P836118	AT1G04310	AT1G04310.1	0.170671	2.03634	0.144922
GT_A_84_P15325	AT1G73340	electron carrier/ heme binding / iron ion binding / monooxygenase/ oxygen binding	0.171957	4.29629	0.242998
GT_A_84_P235303	AT1G66450	DC1 domain-containing protein	0.172276	1.40306	0.195409
GT_A_84_P595471		pentatricopeptide (PPR) repeat-containing protein	0.172388	1.27988	0.372636
GT_A_84_P839042	AT1G11925	AT1G11925.1	0.172393	1.02184	0.40589
GT_A_84_P845171	AT5G42800	CD533642	0.172932	1.90994	0.245195
GT_A_84_P858897		TC311854	0.173006	1.02811	0.28246
GT_A_84_P15115	AT3G24982	protein binding	0.173554	1.91272	0.270387
GT_A_84_P577990	AT5G44570	hypothetical protein	0.173929	1.87773	0.267127
GT_A_84_P606188	AT3G28007	nodulin MtN3 family protein	0.174057	1.62504	0.236402
GT_A_84_P225239	AT3G13960	AtGRF5 (GROWTH-REGULATING FACTOR 5); transcription activator	0.175466	1.24157	0.391205
GT_A_84_P829247	AT2G17780	TA46078_3702	0.176661	1.27389	0.119904
GT_A_84_P549035		MATE efflux family protein	0.176873	1.77748	0.379603
GT_A_84_P17175	AT1G32560	late embryogenesis abundant group 1 domain-containing protein	0.177034	1.39311	0.360081
GT_A_84_P22056	AT2G01770	VIT1 (vacuolar iron transporter 1); iron ion transmembrane transporter	0.177494	1.41397	0.299772
GT_A_84_P19374			0.177741	1.95344	0.112973
GT_A_84_P546294	AT1G55050	hypothetical protein	0.177979	1.0368	0.33027
GT_A_84_P818756	AT3G13560	AT3G13560.2	0.178078	1.20562	0.193983
GT_A_84_P14711	AT3G51810	EM1 (LATE EMBRYOGENESIS ABUNDANT 1)	0.179293	1.37417	0.299772
GT_A_84_P828451	AT4G01130	AT4G01130.1	0.179652	1.12149	0.113342
GT_A_84_P833276	AT4G27910	AT4G27910.1	0.180083	1.00813	0.486508
GT_A_84_P22771	AT1G13230	leucine-rich repeat family protein	0.180724	1.51152	0.465503
GT_A_84_P831942	AT4G20320	AT4G20320.2	0.181324	1.20699	0.250906
GT_A_84_P755801	AT2G17780	AT2G17780.1	0.181751	1.2875	0.360503
GT_A_84_P603188	AT1G48325	Expressed protein	0.182204	1.25092	0.195409
GT_A_84_P811915	AT5G66400	AT5G66400.1	0.182283	1.67635	0.467268
GT_A_84_P21916	AT1G19250	FMO1 (FLAVIN-DEPENDENT MONOOXYGENASE 1); FAD binding / NADP or NADPH binding	0.183353	2.29286	0.26127
GT_A_84_P831322	AT3G18770	AT3G18770.1	0.183537	1.26981	0.318226
GT_A_84_P21121	AT2G01200		0.184109	1.51378	0.302337
GT_A_84_P13757	AT3G62090	PIL2 (PHYTOCHROME INTERACTING FACTOR 3-LIKE 2); protein binding / transcription factor	0.184525	1.82221	0.155411
GT_A_84_P709842	AT1G73687	miscRNA	0.184651	1.43933	0.264594
GT_A_84_P286230	AT3G25905	CLE27 (CLAVATA3/ESR-RELATED 27); protein binding / receptor binding	0.184966	1.22515	0.344548
GT_A_84_P805092	AT3G01710	AT3G01710.2	0.185021	1.42354	0.234126
GT_A_84_P95506	AT1G68380	hypothetical protein	0.185167	2.71858	0.194001
GT_A_84_P598538	AT5G52710	heavy-metal-associated domain-containing protein	0.18548	1.05964	0.419251
GT_A_84_P809212	AT5G26000	AT5G26000.1	0.186174	1.00906	0.3384
GT_A_84_P16833	AT5G27870	pectinesterase family protein	0.186553	2.04921	0.299772
GT_A_84_P12554	AT2G29150	tropinone reductase, putative / tropine dehydrogenase, putative	0.18784	1.16148	0.151247
GT_A_84_P22042	AT2G37700	catalytic/ iron ion binding / oxidoreductase	0.188228	1.53171	0.44948
GT_A_84_P15947	AT1G64300	protein kinase family protein	0.188585	1.0357	0.22999
GT_A_84_P837016	AT1G04310	AT1G04310.1	0.188603	1.25287	0.117163
GT_A_84_P861707	AT5G20950	AT5G20950.1	0.188687	1.27985	0.205476
GT_A_84_P15040	AT5G61660	glycine-rich protein	0.188791	1.23917	0.250906
GT_At_Specific_00050715		AT1G53600	0.188855	1.24458	0.388152
GT_A_84_P806966	AT2G40610	AT2G40610.1	0.189457	1.31757	0.240988
GT_A_84_P20061	AT2G43580	chitinase, putative	0.189996	1.39092	0.233367
GT_A_84_P766266	AT1G36530;AT5G32654;AT1G36210	AT5G32654.1	0.190425	1.39759	0.304533
GT_A_84_P767085	AT1G38230;AT4G06742;AT1G38300;AT5G32627;AT5G29035;AT3G29641;AT5G32594;AT5G29337;AT5G28593;AT2G11100;AT1G36210	AT5G29035.1	0.190522	1.64171	0.426465
GT_A_84_P14127	AT5G17430	BBM (BABY BOOM); DNA binding / transcription factor	0.190729	1.51139	0.236402
GT_A_84_P834307	AT3G50590	AT3G50590.1	0.190916	1.48698	0.185575
GT_A_84_P791269		DR750279	0.191064	1.45354	0.466019
GT_A_84_P833145	AT2G41820	AT2G41820.1	0.191147	3.61476	0.250906
GT_A_84_P784679	AT5G45690	AT5G45690.1	0.191166	2.34571	0.155411
GT_A_84_P13400	AT1G18100	E12A11; phosphatidylethanolamine binding	0.191505	1.32896	0.336379
GT_A_84_P18941	AT1G23000	heavy-metal-associated domain-containing protein	0.191555	1.22731	0.301074
GT_A_84_P20954	AT1G71120	GLIP6; carboxylesterase/ lipase	0.191679	1.02452	0.113342
GT_At_Specific_00256562		AT5G14345	0.192326	2.11376	0.194001
GT_A_84_P584249	AT5G43380	TOPP6; protein serine/threonine phosphatase	0.192482	1.13311	0.330725
GT_A_84_P173901	AT5G22355	DC1 domain-containing protein	0.192816	1.55538	0.267377
GT_A_84_P145049	AT1G14880	hypothetical protein	0.192868	1.9772	0.155311
GT_At_Specific_00312208		AT5G66780	0.193278	1.35417	0.300102
GT_A_84_P733298	AT1G79500	2-dehydro-3-deoxyphosphooctonate aldolase	0.194814	1.19327	0.281168
GT_A_84_P23274	AT1G29290	hypothetical protein	0.195101	1.17864	0.344548
GT_A_84_P142559	AT5G08480	VQ motif-containing protein	0.195308	1.19854	0.238452
GT_A_84_P790810	AT5G02200	AT5G02200.1	0.195345	1.25853	0.442305
GT_A_84_P840517	AT3G27331	NP221488	0.195371	1.66057	0.209616
GT_A_84_P19153	AT1G04990	zinc finger (CCCH-type) family protein	0.195879	1.00217	0.144922
GT_A_84_P23499	AT5G47330	palmitoyl protein thioesterase family protein	0.196266	1.26552	0.238452
GT_A_84_P842821		NP301505	0.197074	1.17192	0.112973
GT_At_Specific_00022843		AT1G20530	0.197803	1.15415	0.238452
GT_A_84_P768357	AT5G55410	AT5G55410.2	0.197804	1.17457	0.383783
GT_A_84_P524952	AT1G25240	epsin N-terminal homology (ENTH) domain-containing protein	0.198362	1.57398	0.42692
GT_A_84_P524941	AT1G21320	nucleic acid binding / nucleotide binding	0.198371	1.30199	0.279494
GT_A_84_P595614	AT4G14390	ankyrin repeat family protein	0.198922	1.03727	0.264594
GT_A_84_P753573	AT1G53233	AT1G53233.1	0.199809	1.53891	0.195409
GT_A_84_P10126	AT4G15250	zinc finger (B-box type) family protein	0.199949	1.06958	0.282502
GT_A_84_P842976	AT1G02010	AT1G02010.1	0.200609	1.2126	0.22999
GT_A_84_P753838	AT1G33615	AT1G33615.1	0.200719	1.12391	0.322278
GT_A_84_P814112		AT3G22200.1	0.201379	1.16611	0.2059
GT_A_84_P788162	AT2G34240	AT2G34240.1	0.201434	1.26215	0.264594
GT_A_84_P798149	AT5G33399	EF183130	0.201947	1.19304	0.163506
GT_A_84_P10263	AT5G48100	TT10 (TRANSPARENT TESTA 10); copper ion binding / laccase	0.202968	1.14456	0.204539
GT_A_84_P17268	AT2G14610	PR1 (PATHOGENESIS-RELATED GENE 1)	0.203768	1.9682	0.194001
GT_A_84_P19840	AT1G71691	GDSL-motif lipase/hydrolase family protein	0.204255	1.82493	0.151247
GT_A_84_P559833	AT3G13880	pentatricopeptide (PPR) repeat-containing protein	0.204563	1.03613	0.304533
GT_At_Specific_00025749		AT1G23000	0.205289	1.24909	0.264594
GT_At_Specific_00076071		AT1G76960	0.205743	1.12174	0.278716
GT_A_84_P23571	AT5G66080	protein phosphatase 2C family protein / PP2C family protein	0.20607	1.07855	0.22999
GT_A_84_P73664	AT1G77855	hypothetical protein	0.206195	1.05619	0.195409
GT_A_84_P12193	AT5G59230	transcription factor-related	0.20682	1.12535	0.264594
GT_A_84_P128641	AT1G31880	BRX (BREVIS RADIX); identical protein binding / water channel	0.207237	1.02198	0.404808
GT_A_84_P758187	AT2G26267	AT2G26267.1	0.207466	1.02401	0.238452
GT_A_84_P573065	AT2G28210	ATACA2 (ALPHA CARBONIC ANHYDRASE 2); carbonate dehydratase/ zinc ion binding	0.207586	2.56826	0.245195
GT_A_84_P15831	AT5G07000	ST2B (SULFOTRANSFERASE 2B); hydroxyjasmonate sulfotransferase/ sulfotransferase	0.20806	1.30447	0.195409
GT_A_84_P18321	AT1G53470	MSL4 (MECHANOSENSITIVE CHANNEL OF SMALL CONDUCTANCE-LIKE 4)	0.208086	1.17727	0.399973
GT_A_84_P10630	AT1G21170	SEC5B	0.208479	1.27397	0.25518
GT_A_84_P859906	AT5G62580	AT5G62580.1	0.208483	1.01181	0.339188
GT_A_84_P12310	AT1G76960	hypothetical protein	0.208954	1.13384	0.264594
GT_A_84_P188844	AT2G43930	protein kinase family protein	0.210326	1.02237	0.250906
GT_A_84_P12863	AT4G13420	HAK5 (HIGH AFFINITY K+ TRANSPORTER 5); potassium ion transmembrane transporter	0.210565	1.61298	0.277282
GT_A_84_P21858	AT1G69180	CRC (CRABS CLAW); transcription factor	0.211218	1.34364	0.221379
GT_A_84_P837351	AT5G61890	AT5G61890.1	0.211967	1.09975	0.239779
GT_A_84_P831338		TA48820_3702	0.212514	2.51491	0.242141
GT_A_84_P831610		TA49069_3702	0.212673	2.69566	0.298845
GT_A_84_P265870	AT2G14520	CBS domain-containing protein	0.213625	1.28527	0.203166
GT_A_84_P16136	AT1G04310	ERS2 (ETHYLENE RESPONSE SENSOR 2); ethylene binding / glycogen synthase kinase 3	0.213868	1.07574	0.282502
GT_A_84_P11225	AT5G52810	ornithine cyclodeaminase/mu-crystallin family protein	0.214313	1.3442	0.343856
GT_A_84_P757120	AT2G12646	AT2G12646.1	0.214895	1.24752	0.209616
GT_A_84_P836500		TA52485_3702	0.219461	1.46913	0.399594
GT_A_84_P835723	AT2G16390	AT2G16390.1	0.219994	1.0362	0.369781
GT_A_84_P13353	AT1G66390	MYB90 (MYB DOMAIN PROTEIN 90); DNA binding / transcription factor	0.220173	1.7254	0.395205
GT_A_84_P561092	AT5G45150	RTL3 (RNase three-like protein 3); RNA binding / double-stranded RNA binding	0.220508	1.6769	0.40589
GT_A_84_P15041	AT5G61890	AP2 domain-containing transcription factor family protein	0.222659	1.19199	0.23034
GT_A_84_P526863	AT2G01200	IAA32 (INDOLE-3-ACETIC ACID INDUCIBLE 32); transcription factor	0.22272	1.74956	0.299772
GT_A_84_P811911	AT5G66400	AT5G66400.1	0.223554	1.1982	0.137854
GT_A_84_P238643	AT4G31615	DNA binding / transcription factor	0.223874	1.16454	0.227269
GT_A_84_P853304	AT5G01300	AT5G01300.1	0.224075	1.41051	0.318226
GT_A_84_P768351	AT5G49410	AT5G49410.2	0.224488	1.00263	0.283671
GT_A_84_P591926	AT3G21680	hypothetical protein	0.224604	1.03563	0.207742
GT_A_84_P817532	AT1G68920	AT1G68920.2	0.225565	1.22927	0.299772
GT_A_84_P18080	AT1G50060	pathogenesis-related protein, putative	0.225629	1.77639	0.267315
GT_A_84_P841355		NP227009	0.225738	2.18119	0.261164
GT_A_84_P808187	AT1G70850	AT1G70850.3	0.225868	1.11507	0.362828
GT_A_84_P137009	AT5G44420	PDF1.2	0.226235	1.5122	0.36568
GT_A_84_P10306	AT5G59930	DC1 domain-containing protein / UV-B light-insensitive protein, putative	0.227406	1.06495	0.318226
GT_A_84_P827147	AT1G61800	AT1G61800.1	0.227688	1.7503	0.298678
GT_A_84_P21460	AT4G38030	lyase	0.227948	3.95209	0.490334
GT_A_84_P23051	AT3G04050	pyruvate kinase, putative	0.228489	1.04351	0.325957
GT_A_84_P795916	AT1G18835	AT1G18835.1	0.230665	1.13166	0.30269
GT_A_84_P756276	AT2G21660	AT2G21660.1	0.231319	1.31119	0.250906
GT_A_84_P853987	AT1G69260	AT1G69260.1	0.232205	1.47005	0.238452
GT_A_84_P13944	AT5G07620	protein kinase family protein	0.232533	1.16967	0.239779
GT_A_84_P174401	AT4G16820	lipase class 3 family protein	0.233354	1.09308	0.416786
GT_A_84_P10221	AT5G36870	ATGSL09 (glucan synthase-like 9); 1,3-beta-glucan synthase	0.235165	1.08315	0.360825
GT_A_84_P18477	AT3G60120	BGLU27 (BETA GLUCOSIDASE 27); catalytic/ cation binding / hydrolase	0.235197	1.77614	0.249404
GT_At_Specific_00109086		AT2G29452	0.23566	1.64839	0.389737
GT_A_84_P817353		AT5G13490.1	0.235697	1.26562	0.22999
GT_A_84_P553370	AT1G56240	AtPP2-B13 (Phloem protein 2-B13); carbohydrate binding	0.235756	1.95154	0.36568
GT_A_84_P824861		AT1G79460.1	0.236474	1.16816	0.251423
GT_A_84_P813219	AT3G54810	AT3G54810.1	0.236795	1.33536	0.402379
GT_A_84_P513574	AT2G14560	LURP1 (LATE UPREGULATED IN RESPONSE TO HYALOPERONOSPORA PARASITICA)	0.237205	1.70767	0.407564
GT_A_84_P11148	AT5G24080	protein kinase family protein	0.237849	2.42487	0.238654
GT_A_84_P817581	AT4G32250	TA33256_3702	0.240328	1.32262	0.155311
GT_A_84_P22087	AT3G10190	calmodulin, putative	0.240471	1.0514	0.151247
GT_A_84_P609989	AT5G18720	hypothetical protein	0.241471	2.04415	0.151247
GT_A_84_P846752		BX835450	0.242249	1.20334	0.151247
GT_A_84_P16441	AT3G07010	pectate lyase family protein	0.242362	1.0183	0.326616
GT_A_84_P847203	AT1G65120	AT1G65120.2	0.243062	1.56872	0.23544
GT_A_84_P766734	AT5G29075	AT5G29075.1	0.243296	1.44993	0.318226
GT_A_84_P790913	AT4G00695	AT4G00695.1	0.243959	1.2688	0.327314
GT_A_84_P559688	AT2G19920	RNA-dependent RNA polymerase family protein	0.244446	1.93257	0.369203
GT_A_84_P149258	AT2G23050	NPY4 (NAKED PINS IN YUC MUTANTS 4); protein binding / signal transducer	0.245604	1.32685	0.391205
GT_A_84_P19394	AT3G53360	pentatricopeptide (PPR) repeat-containing protein	0.245627	1.10056	0.344548
GT_A_84_P140339	AT5G38396	F-box family protein	0.246392	1.28255	0.175156
GT_A_84_P231939	AT1G61800	GPT2; antiporter/ glucose-6-phosphate transmembrane transporter	0.247184	1.66387	0.287995
GT_A_84_P830558		TA47989_3702	0.247244	1.88705	0.249404
GT_A_84_P18847	AT5G67430	GCN5-related N-acetyltransferase (GNAT) family protein	0.247465	1.54072	0.296726
GT_A_84_P19166	AT2G36750	UGT73C1 (UDP-GLUCOSYL TRANSFERASE 73C1); UDP-glucosyltransferase	0.24765	1.58393	0.44948
GT_A_84_P828773	AT3G14360	AT3G14360.1	0.248144	1.25773	0.119904
GT_A_84_P17601	AT1G29230	CIPK18 (CBL-INTERACTING PROTEIN KINASE 18); ATP binding / kinase/ protein kinase	0.248393	1.43016	0.239779
GT_A_84_P847330	AT3G46970	AT3G46970.1	0.24863	1.89902	0.437671
GT_A_84_P861191		TC313241	0.24879	1.16579	0.139072
GT_A_84_P847162	AT4G16740	AT4G16740.2	0.250386	1.85044	0.574567
GT_A_84_P790736	AT3G60670	AT3G60670.1	0.251206	1.30651	0.239779
GT_A_84_P20824	AT1G23070	hypothetical protein	0.252115	1.24858	0.262146
GT_A_84_P293214	AT1G48370	YSL8 (YELLOW STRIPE LIKE 8); oligopeptide transporter	0.253141	1.01157	0.282502
GT_A_84_P302850	AT2G37870	protease inhibitor/seed storage/lipid transfer protein (LTP) family protein	0.255096	1.73294	0.113342
GT_A_84_P752761	AT1G76954	AT1G76954.1	0.255115	1.34445	0.451297
GT_A_84_P827950	AT3G17680	AT3G17680.1	0.256381	1.27554	0.264969
GT_A_84_P784528	AT4G36930	AT4G36930.1	0.256476	1.12704	0.159499
GT_At_Specific_00205031		AT4G09300	0.257925	1.22198	0.344548
GT_A_84_P803335	AT3G28007	AT3G28007.1	0.25848	1.33609	0.191624
GT_A_84_P19392	AT3G53040	late embryogenesis abundant protein, putative / LEA protein, putative	0.25877	1.30417	0.325973
GT_At_Specific_00119305		AT2G37870	0.259179	1.70385	0.139072
GT_A_84_P506584	AT2G46375	hypothetical protein	0.259279	1.81704	0.199886
GT_A_84_P21937	AT1G57670	Toll-Interleukin-Resistance (TIR) domain-containing protein	0.259479	1.17996	0.151247
GT_A_84_P515517	AT3G12410	3'-5' exonuclease/ nucleic acid binding	0.259975	1.71552	0.234892
GT_A_84_P23844	AT2G43870	polygalacturonase, putative / pectinase, putative	0.261085	1.1204	0.144922
GT_A_84_P16776	AT5G06760	late embryogenesis abundant group 1 domain-containing protein	0.261996	1.13102	0.29286
GT_A_84_P832301	AT3G05150	AT3G05150.1	0.26306	1.08173	0.24955
GT_A_84_P12287	AT1G01480	ACS2; 1-aminocyclopropane-1-carboxylate synthase	0.264869	1.08796	0.402379
GT_A_84_P805958	AT2G21660	AT2G21660.2	0.265458	1.32426	0.369203
GT_A_84_P769325	AT5G11412	AT5G11412.1	0.265931	1.33044	0.369045
GT_A_84_P13727	AT3G54810	zinc finger (GATA type) family protein	0.266357	1.14433	0.16235
GT_A_84_P824689		AT4G36710.1	0.266726	1.41357	0.320781
GT_A_84_P15439	AT2G35770	scpl28 (serine carboxypeptidase-like 28); serine-type carboxypeptidase	0.266797	1.30409	0.264594
GT_A_84_P792233	AT3G27884	DR250225	0.268437	1.23305	0.134982
GT_A_84_P818269	AT4G00230	AT4G00230.1	0.268989	1.50326	0.350213
GT_A_84_P21141	AT3G10200	dehydration-responsive protein-related	0.269905	1.40327	0.339951
GT_A_84_P551689	AT2G06925	PLA2-ALPHA; phospholipase A2	0.270335	1.41085	0.434684
GT_A_84_P87009	AT5G28510	BGLU24 (BETA GLUCOSIDASE 24); catalytic/ cation binding / hydrolase	0.270509	1.94234	0.203897
GT_A_84_P581876	AT1G76955	Expressed protein	0.270658	1.58014	0.296923
GT_A_84_P22337	AT4G21440	ATMYB102 (ARABIDOPSIS MYB-LIKE 102); DNA binding / transcription factor	0.272121	1.39533	0.191394
GT_A_84_P608809	AT3G22510	hypothetical protein	0.272218	1.20205	0.249404
GT_A_84_P212908	AT4G35700	zinc finger (C2H2 type) family protein	0.274294	2.70959	0.332669
GT_A_84_P717435			0.274296	1.12949	0.247348
GT_A_84_P869674	AT3G50650	AT3G50650.1	0.275935	1.10177	0.151247
GT_At_Specific_00069652		AT1G71110	0.276434	1.01949	0.250906
GT_A_84_P827945	AT3G17680	AT3G17680.1	0.276559	1.20869	0.296318
GT_A_84_P11705	AT3G10870	MES17 (METHYL ESTERASE 17); hydrolase/ hydrolase, acting on ester bonds	0.277139	1.03522	0.207742
GT_A_84_P756136	AT2G05280	AT2G05280.1	0.277233	1.05872	0.441585
GT_A_84_P13148	AT5G61320	CYP89A3; electron carrier/ heme binding / iron ion binding / monooxygenase	0.279146	2.60755	0.169096
GT_A_84_P101486	AT5G32162		0.280633	7.01662	0.282502
GT_A_84_P504549	AT1G23465	signal peptidase-related	0.281325	1.3006	0.331253
GT_A_84_P87509	AT3G60970	ATMRP15; ATPase, coupled to transmembrane movement of substances	0.281374	1.58084	0.112973
GT_A_84_P14137	AT5G13170	SAG29 (SENESCENCE-ASSOCIATED PROTEIN 29)	0.282762	2.45942	0.23372
GT_A_84_P850105	AT5G66455	AT5G66455.2	0.283801	1.66263	0.209616
GT_A_84_P13197	AT5G09470	mitochondrial substrate carrier family protein	0.284879	2.14508	0.298798
GT_A_84_P753586	AT1G15175	AT1G15175.1	0.285659	2.39318	0.308557
GT_A_84_P605779	AT1G12845	hypothetical protein	0.286256	1.27355	0.407922
GT_A_84_P765664	AT4G37682	AT4G37682.1	0.287192	2.40323	0.278716
GT_A_84_P19901	AT1G30860	protein binding / zinc ion binding	0.288156	1.08532	0.308243
GT_A_84_P753520	AT1G01448	AT1G01448.2	0.288806	1.11662	0.391205
GT_At_Specific_00067527		AT1G69350	0.289445	1.05418	0.298482
GT_A_84_P20410	AT1G06080	ADS1 (DELTA 9 DESATURASE 1); oxidoreductase	0.290391	1.0411	0.155311
GT_A_84_P767740	AT5G23810	AT5G23810.1	0.290818	1.67583	0.112973
GT_A_84_P14410	AT2G33080	AtRLP28 (Receptor Like Protein 28); protein binding	0.290857	1.12231	0.344548
GT_A_84_P13948	AT5G09520	hydroxyproline-rich glycoprotein family protein	0.29094	1.68985	0.404899
GT_A_84_P815283	AT4G26530	AT4G26530.2	0.291671	2.57162	0.25518
GT_A_84_P12031	AT5G01300	phosphatidylethanolamine-binding family protein	0.291881	2.04804	0.203166
GT_A_84_P811890	AT4G08950	AT4G08950.1	0.292221	1.49649	0.299772
GT_A_84_P17710	AT5G02760	protein phosphatase 2C family protein / PP2C family protein	0.293671	1.61535	0.40589
GT_A_84_P16865	AT5G44310	late embryogenesis abundant domain-containing protein	0.294868	1.42163	0.298845
GT_A_84_P18229	AT2G27550	ATC (ARABIDOPSIS THALIANA CENTRORADIALIS); phosphatidylethanolamine binding	0.295236	1.02467	0.270387
GT_A_84_P845982	AT2G39900	AT2G39900.1	0.295857	1.15694	0.207742
GT_A_84_P857667	AT5G13790	AT5G13790.1	0.29816	1.5628	0.112973
GT_A_84_P17815	AT5G45200	disease resistance protein (TIR-NBS-LRR class), putative	0.2987	2.08784	0.299772
GT_A_84_P811894	AT4G08950	AT4G08950.1	0.299186	1.48986	0.155311
GT_A_84_P560506	AT1G69430	hypothetical protein	0.299997	1.06642	0.281476
GT_A_84_P525981	AT2G04860	pentatricopeptide (PPR) repeat-containing protein	0.300115	1.07657	0.267127
GT_A_84_P815985	AT5G22500	AT5G22500.1	0.300169	1.82309	0.424029
GT_A_84_P243685			0.301582	1.23133	0.16235
GT_A_84_P15603	AT3G51680	short-chain dehydrogenase/reductase (SDR) family protein	0.302362	1.15813	0.234902
GT_A_84_P835347	AT3G49330	AT3G49330.1	0.302745	1.09893	0.144922
GT_A_84_P18669	AT5G07040	zinc finger (C3HC4-type RING finger) family protein	0.303281	1.22073	0.195409
GT_A_84_P590913	AT2G36980	pentatricopeptide (PPR) repeat-containing protein	0.303436	1.91828	0.198851
GT_A_84_P10396	AT1G01460	PIPK11; 1-phosphatidylinositol-4-phosphate 5-kinase/ phosphatidylinositol phosphate kinase	0.304173	1.11233	0.366849
GT_A_84_P817913		TA33540_3702	0.305006	1.07697	0.316469
GT_A_84_P21473	AT4G15210	BAM5 (BETA-AMYLASE 5); beta-amylase	0.305569	1.83185	0.214958
GT_A_84_P826349	AT5G39790	AT5G39790.1	0.306347	1.38327	0.256831
GT_A_84_P826365	AT3G50650	AT3G50650.1	0.306465	1.11741	0.29286
GT_A_84_P136105	AT3G14360	lipase class 3 family protein	0.307603	1.08046	0.134982
GT_A_84_P806696	AT1G20620	AT1G20620.5	0.309286	1.0467	0.379112
GT_A_84_P21248	AT3G44560	FAR8 (FATTY ACID REDUCTASE 8); fatty acyl-CoA reductase (alcohol-forming)/ oxidoreductase, acting on the CH-CH group of donors	0.310439	1.52866	0.203364
GT_A_84_P762273	AT3G50751	AT3G50751.1	0.310862	1.22204	0.313821
GT_A_84_P23716	AT1G12980	ESR1 (ENHANCER OF SHOOT REGENERATION 1); DNA binding / protein binding / transcription factor	0.311119	2.0057	0.250906
GT_A_84_P16788	AT5G10230	ANNAT7 (ANNEXIN ARABIDOPSIS 7); calcium ion binding / calcium-dependent phospholipid binding	0.311137	1.77238	0.207742
GT_A_84_P19259	AT3G10560	UNE9 (UNFERTILIZED EMBRYO SAC 9); electron carrier/ heme binding / iron ion binding / monooxygenase/ oxygen binding	0.311374	1.21149	0.137854
GT_A_84_P21315	AT3G60160	ATMRP9; ATPase, coupled to transmembrane movement of substances	0.311557	1.17491	0.299772
GT_A_84_P750319	AT1G19630	AT1G19630.1	0.313178	1.31514	0.151247
GT_A_84_P106016	AT1G15125	S-adenosylmethionine-dependent methyltransferase/ methyltransferase	0.313747	1.50487	0.112973
GT_A_84_P514686	AT3G46300	hypothetical protein	0.317173	1.488	0.240988
GT_A_84_P543484	AT4G33280	DNA binding / transcription factor	0.318293	1.19551	0.307839
GT_A_84_P836351	AT3G19230	AT3G19230.1	0.319484	3.36423	0.180817
GT_A_84_P21625	AT5G52300	LTI65 (LOW-TEMPERATURE-INDUCED 65)	0.320423	1.90108	0.21331
GT_A_84_P863449	AT2G47770	AT2G47770.1	0.32119	1.94364	0.250906
GT_A_84_P764634	AT4G06735	AT4G06735.1	0.321337	1.20378	0.112973
GT_A_84_P567982	AT4G15210	BAM5 (BETA-AMYLASE 5); beta-amylase	0.321445	1.69275	0.256831
GT_A_84_P146938	AT1G02450	NIMIN1 (NIM1-INTERACTING 1); protein binding	0.321474	1.14228	0.16235
GT_A_84_P16727	AT4G37390	BRU6; indole-3-acetic acid amido synthetase	0.322689	1.06032	0.293425
GT_A_84_P793568	AT1G75960	AT1G75960.1	0.328298	1.00568	0.25526
GT_A_84_P863265	AT4G12550	AT4G12550.1	0.330412	1.71963	0.523215
GT_A_84_P18221	AT2G36640	ATECP63 (EMBRYONIC CELL PROTEIN 63)	0.330926	1.46805	0.151247
GT_At_Specific_00190562		AT3G60164	0.331375	1.36154	0.263112
GT_A_84_P815531		TA31683_3702	0.333031	1.37677	0.301074
GT_A_84_P786467		AV783755	0.333361	1.6033	0.271311
GT_A_84_P23682	AT1G09510	cinnamyl-alcohol dehydrogenase family / CAD family	0.334957	1.89866	0.22999
GT_A_84_P94009	AT1G75120	RRA1 (REDUCED RESIDUAL ARABINOSE 1)	0.335097	1.00026	0.318642
GT_A_84_P831686	AT1G11060	AT1G11060.1	0.335417	1.01689	0.112973
GT_A_84_P817931	AT5G39410	AT5G39410.1	0.336253	1.10436	0.201859
GT_A_84_P764402	AT4G16740	AT4G16740.1	0.336318	2.89601	0.404899
GT_A_84_P15583	AT3G46970	PHS2 (ALPHA-GLUCAN PHOSPHORYLASE 2); phosphorylase/ transferase, transferring glycosyl groups	0.338583	1.23269	0.155411
GT_A_84_P15628	AT3G57240	BG3 (BETA-1,3-GLUCANASE 3); cellulase/ hydrolase, hydrolyzing O-glycosyl compounds	0.338799	1.68253	0.238452
GT_A_84_P806743	AT1G20620	AT1G20620.5	0.341342	1.11005	0.264969
GT_A_84_P21985	AT2G40840	DPE2 (DISPROPORTIONATING ENZYME 2); 4-alpha-glucanotransferase/ heteroglycan binding	0.342334	1.09241	0.24952
GT_A_84_P23436	AT5G22500	FAR1 (FATTY ACID REDUCTASE 1); fatty acyl-CoA reductase (alcohol-forming)/ oxidoreductase, acting on the CH-CH group of donors	0.342838	1.54337	0.301074
GT_A_84_P230529	AT4G26530	fructose-bisphosphate aldolase, putative	0.342974	1.24009	0.302663
GT_A_84_P12413	AT1G77730	pleckstrin homology (PH) domain-containing protein	0.343625	1.76172	0.40589
GT_A_84_P511950	AT3G10510	kelch repeat-containing F-box family protein	0.344804	1.34011	0.112973
GT_A_84_P571542	AT4G12900	gamma interferon responsive lysosomal thiol reductase family protein / GILT family protein	0.345503	1.29497	0.113342
GT_A_84_P758347	AT2G36261	AT2G36261.1	0.347423	1.00571	0.22999
GT_A_84_P806687	AT1G20620	AT1G20620.5	0.348352	1.00269	0.495667
GT_A_84_P22906	AT2G42560	late embryogenesis abundant domain-containing protein / LEA domain-containing protein	0.349962	3.70598	0.24952
GT_A_84_P23433	AT1G49570	peroxidase, putative	0.35018	1.13356	0.29286
GT_At_Specific_00016011		AT1G14518	0.350216	1.05583	0.112973
GT_A_84_P800917	AT2G17230	AT2G17230.1	0.35051	1.18413	0.364528
GT_A_84_P19657	AT5G23980	FRO4 (FERRIC REDUCTION OXIDASE 4); ferric-chelate reductase	0.352133	1.42287	0.125912
GT_A_84_P816568	AT5G64860	AT5G64860.1	0.354177	1.88026	0.33027
GT_A_84_P826232	AT1G64110	AT1G64110.2	0.355089	1.2497	0.267994
GT_At_Specific_00219528		AT4G21020	0.355226	1.92008	0.113342
GT_A_84_P842072	AT1G67370	AT1G67370.1	0.356724	1.33153	0.333472
GT_A_84_P832537	AT5G42290	TA49773_3702	0.357172	1.23418	0.33027
GT_A_84_P799914	AT3G05640	AT3G05640.2	0.357235	1.00011	0.242998
GT_A_84_P848744		TC301890	0.358779	1.10156	0.333472
GT_A_84_P187174	AT3G17520	late embryogenesis abundant domain-containing protein / LEA domain-containing protein	0.360621	1.37391	0.216905
GT_A_84_P833206	AT4G36600	AT4G36600.1	0.360841	1.82499	0.151247
GT_A_84_P13270	AT1G70220	hypothetical protein	0.361708	1.14822	0.207742
GT_A_84_P843056	AT1G63240	AT1G63240.1	0.361946	1.02118	0.207746
GT_A_84_P307340	AT1G26780	myb family transcription factor (MYB117)	0.362206	1.63598	0.139066
GT_A_84_P575300	AT5G39330	hypothetical protein	0.362548	1.64651	0.404899
GT_A_84_P10042	AT4G21020	late embryogenesis abundant domain-containing protein	0.363333	2.26274	0.250906
GT_A_84_P157385	AT2G45410	LBD19 (LOB DOMAIN-CONTAINING PROTEIN 19)	0.363411	1.36669	0.277282
GT_A_84_P806759	AT1G20620	AT1G20620.5	0.363973	1.03561	0.134982
GT_A_84_P816631	AT2G17500	AT2G17500.2	0.364326	1.39676	0.357341
GT_A_84_P762501	AT3G14025	AT3G14025.1	0.36584	1.20157	0.180817
GT_A_84_P17048	AT1G61450	hypothetical protein	0.365919	1.11069	0.195409
GT_A_84_P19568	AT4G38000	Dof-type zinc finger domain-containing protein	0.366432	1.53128	0.465994
GT_A_84_P831354	AT4G17470	AT4G17470.1	0.366513	1.21971	0.194001
GT_A_84_P12435	AT1G79900	BAC2; L-ornithine transmembrane transporter/ binding / carnitine:acyl carnitine antiporter	0.367055	1.79031	0.191394
GT_A_84_P10242	AT5G42590	CYP71A16; electron carrier/ heme binding / iron ion binding / monooxygenase	0.370803	1.29759	0.191624
GT_A_84_P608981	AT4G24600	hypothetical protein	0.371159	1.20597	0.236467
GT_A_84_P531982	AT1G08270	hypothetical protein	0.371553	1.74122	0.239779
GT_A_84_P563065	AT1G30250	hypothetical protein	0.37233	1.50893	0.155411
GT_A_84_P10906	AT3G58120	BZIP61; DNA binding / transcription activator/ transcription factor	0.373637	1.43988	0.318226
GT_A_84_P15113	AT1G71520	AP2 domain-containing transcription factor, putative	0.374188	1.23193	0.174456
GT_A_84_P216518			0.375758	1.27239	0.14515
GT_A_84_P23087	AT3G17180	scpl33 (serine carboxypeptidase-like 33); serine-type carboxypeptidase	0.376098	1.30357	0.323501
GT_A_84_P815281	AT4G26530	AT4G26530.1	0.379022	1.93942	0.164169
GT_A_84_P17955	AT1G22380	AtUGT85A3 (UDP-glucosyl transferase 85A3); glucuronosyltransferase	0.381099	2.42079	0.236467
GT_A_84_P13790	AT4G08950	EXO (EXORDIUM)	0.381766	1.17025	0.434684
GT_A_84_P603820	AT5G38320	hypothetical protein	0.383474	1.45491	0.221379
GT_A_84_P14443	AT2G29310	tropinone reductase, putative / tropine dehydrogenase, putative	0.383719	1.29215	0.191394
GT_A_84_P784276	AT5G15840	AT5G15840.1	0.384134	1.18306	0.15709
GT_A_84_P22611	AT5G62420	aldo/keto reductase family protein	0.385841	1.31185	0.20363
GT_A_84_P23860	AT1G64110	AAA-type ATPase family protein	0.386223	1.16631	0.221379
GT_A_84_P11607	AT2G45570	CYP76C2; electron carrier/ heme binding / iron ion binding / monooxygenase	0.387979	2.02988	0.22999
GT_A_84_P834809	AT3G12220	AT3G12220.1	0.388288	1.27388	0.36568
GT_A_84_P23516	AT5G51990	CBF4 (C- REPEAT-BINDING FACTOR 4); DNA binding / transcription activator	0.391534	1.06432	0.29286
GT_A_84_P789317	AT3G56275	AT3G56275.1	0.393698	1.68353	0.258804
GT_A_84_P794569		BX836376	0.394976	1.02157	0.30563
GT_A_84_P104886	AT5G63350	hypothetical protein	0.39685	1.091	0.267315
GT_A_84_P752604	AT1G09500	AT1G09500.2	0.398497	2.35121	0.236402
GT_A_84_P854889	AT2G45570	AT2G45570.1	0.403193	1.23975	0.331964
GT_A_84_P109472	AT2G47770	benzodiazepine receptor-related	0.403293	1.46659	0.299772
GT_A_84_P760622	AT3G56275	AT3G56275.1	0.403643	1.62316	0.247348
GT_A_84_P828117	AT1G72120	AT1G72120.1	0.404178	1.32359	0.203897
GT_A_84_P304550	AT3G19920	hypothetical protein	0.405248	2.70684	0.44948
GT_A_84_P820937	AT2G42580	AT2G42580.1	0.406935	1.16901	0.207742
GT_A_84_P582388	AT5G17390	universal stress protein (USP) family protein	0.408449	1.33445	0.151247
GT_A_84_P515463	AT2G44735	hypothetical protein	0.408521	1.10588	0.386442
GT_A_84_P11248	AT5G59220	protein phosphatase 2C, putative / PP2C, putative	0.408808	1.05631	0.380261
GT_A_84_P11250	AT5G59570	myb family transcription factor	0.409281	1.15955	0.250906
GT_A_84_P14611	AT3G29320	glucan phosphorylase, putative	0.409331	1.51777	0.258195
GT_A_84_P14274	AT1G52690	late embryogenesis abundant protein, putative / LEA protein, putative	0.412457	1.44999	0.203166
GT_A_84_P829823	AT2G45420	AT2G45420.1	0.412538	1.22593	0.350213
GT_A_84_P792640		DR378240	0.414551	1.10811	0.347009
GT_A_84_P607538	AT1G13500	hypothetical protein	0.417301	1.05143	0.353927
GT_A_84_P10409	AT1G51190	PLT2 (PLETHORA 2); transcription factor	0.417865	1.02346	0.258804
GT_At_Specific_00175430		AT3G47030	0.419724	1.12281	0.113342
GT_A_84_P15484	AT3G10910;AT3G10912	CPuORF63 (Conserved peptide upstream open reading frame 63)	0.420652	1.02997	0.389801
GT_A_84_P553664	AT3G25970	pentatricopeptide (PPR) repeat-containing protein	0.420746	1.04352	0.299772
GT_A_84_P573423	AT4G36600	hypothetical protein	0.422395	1.50513	0.117163
GT_A_84_P17676	AT4G37990	ELI3-2 (ELICITOR-ACTIVATED GENE 3-2); aryl-alcohol dehydrogenase	0.422403	1.76344	0.216815
GT_A_84_P819980		AT3G52180.2	0.425471	1.16873	0.112973
GT_A_84_P862359	AT3G52180	AT3G52180.1	0.426381	1.18875	0.144922
GT_A_84_P512014	AT3G29060	hypothetical protein	0.426942	1.76887	0.400653
GT_A_84_P20107	AT2G32270	ZIP3; zinc ion transmembrane transporter	0.42715	1.01632	0.302337
GT_A_84_P784935	AT1G15330	AT1G15330.1	0.42758	1.04813	0.139072
GT_A_84_P581125	AT2G45610	hydrolase	0.427859	1.28298	0.30563
GT_A_84_P22736	AT1G09500	cinnamyl-alcohol dehydrogenase family / CAD family	0.428123	2.17562	0.207742
GT_A_84_P602777	AT4G23515	Toll-Interleukin-Resistance (TIR) domain-containing protein	0.430908	1.00507	0.299772
GT_A_84_P265780	AT5G15840	CO (CONSTANS); transcription factor/ transcription regulator/ zinc ion binding	0.431007	1.2116	0.360774
GT_A_84_P17313	AT2G37770	aldo/keto reductase family protein	0.431537	1.41938	0.350213
GT_A_84_P16780	AT5G07500	PEI1; nucleic acid binding / transcription factor/ zinc-mediated transcriptional activator	0.432019	1.96002	0.24952
GT_A_84_P204818	AT3G27900	hypothetical protein	0.432924	1.20056	0.306787
GT_A_84_P823667	AT3G51450	AT3G51450.1	0.435036	1.00244	0.270387
GT_A_84_P23653	AT1G03990	alcohol oxidase-related	0.435827	1.43297	0.216609
GT_A_84_P297344	AT5G23240	DNAJ heat shock N-terminal domain-containing protein	0.436612	1.73682	0.234126
GT_A_84_P20395	AT4G02320	pectinesterase family protein	0.437238	1.04824	0.185575
GT_At_Specific_00108922		AT2G29310	0.443694	1.0896	0.461194
GT_A_84_P15021	AT5G57530	xyloglucan:xyloglucosyl transferase, putative / xyloglucan endotransglycosylase	0.448027	1.36983	0.325973
GT_A_84_P851226	AT3G46640	AT3G46640.2	0.448534	1.13819	0.261456
GT_At_Specific_00136716		AT3G05110	0.449874	1.1401	0.146753
GT_A_84_P767563	AT5G38320	AT5G38320.1	0.451045	1.52792	0.221379
GT_A_84_P789787		AU239436	0.452573	1.13494	0.24049
GT_A_84_P18335	AT3G02480	ABA-responsive protein-related	0.452742	1.44816	0.22999
GT_A_84_P767860	AT5G64860	AT5G64860.1	0.452963	1.32994	0.339951
GT_A_84_P568745	AT3G27250	hypothetical protein	0.462758	1.19384	0.113342
GT_A_84_P109442	AT3G52180	SEX4 (STARCH-EXCESS 4); polysaccharide binding / protein tyrosine	0.470376	1.0464	0.207742
GT_A_84_P11477	AT1G48690	auxin-responsive GH3 family protein	0.471345	1.12143	0.464976
GT_A_84_P244235	AT3G20810	transcription factor jumonji (jmjC) domain-containing protein	0.473372	1.18843	0.137854
GT_A_84_P767369	AT5G33355	AT5G33355.1	0.473962	1.34503	0.112973
GT_A_84_P812392	AT4G33720	AT4G33720.1	0.478391	2.4309	0.264594
GT_A_84_P57250	AT1G80160	lactoylglutathione lyase family protein / glyoxalase I family protein	0.48245	1.08721	0.113342
GT_A_84_P844408		TC281690	0.484081	1.35172	0.23372
GT_A_84_P11018	AT4G27850	proline-rich family protein	0.48639	1.02776	0.443466
GT_A_84_P15547	AT3G22560	GCN5-related N-acetyltransferase (GNAT) family protein	0.487891	1.30304	0.387185
GT_A_84_P542288	AT4G17470	palmitoyl protein thioesterase family protein	0.49121	1.14673	0.339951
GT_A_84_P19997	AT1G74670	gibberellin-responsive protein, putative	0.494687	1.16892	0.403975
GT_A_84_P12641	AT3G10450	SCPL7 (SERINE CARBOXYPEPTIDASE-LIKE 7); serine-type carboxypeptidase	0.499787	1.01463	0.113342
GT_A_84_P602046	AT5G40790	hypothetical protein	0.502004	1.65144	0.112973
GT_A_84_P274500	AT1G77880	F-box family protein	0.503702	1.04114	0.22999
GT_A_84_P24123	AT3G53250	auxin-responsive family protein	0.505712	1.40316	0.299772
GT_A_84_P839865	AT5G33355;AT3G59930	AT5G33355.1	0.518261	1.05786	0.139072
GT_A_84_P589027	AT2G04190	meprin and TRAF homology domain-containing protein / MATH domain-containing protein	0.542601	1.75089	0.251834
GT_A_84_P16105	AT1G70080	terpene synthase/cyclase family protein	0.547997	2.21482	0.16235
GT_A_84_P16676	AT4G25000	AMY1 (ALPHA-AMYLASE-LIKE); alpha-amylase	0.551436	1.04699	0.242998
GT_A_84_P297634	AT5G15500	ankyrin repeat family protein	0.555329	1.40045	0.151247
GT_A_84_P206748			0.561108	1.68491	0.238452
GT_A_84_P507561	AT3G21320	hypothetical protein	0.564074	1.00357	0.112973
GT_A_84_P16913	AT5G57550	XTR3 (XYLOGLUCAN ENDOTRANSGLYCOSYLASE 3); hydrolase, acting on glycosyl bonds	0.567608	1.43392	0.221379
GT_A_84_P822012	AT4G24000	AT4G24000.1	0.571686	1.63021	0.161061
GT_At_Specific_00301349			0.576236	1.45776	0.578319
GT_A_84_P250085	AT3G61270	hypothetical protein	0.576667	1.04796	0.26127
GT_A_84_P551163	AT4G24000	ATCSLG2; cellulose synthase/ transferase/ transferase, transferring glycosyl groups	0.636232	1.34915	0.284665
GT_A_84_P12264	AT5G58310	MES18 (METHYL ESTERASE 18); hydrolase/ hydrolase, acting on ester bonds	0.650434	1.06067	0.301074
S1B Table. Down-regulated Genes in response to combined stress treatment in pad2.1
ProbeName	TAIR_Locus	GeneName	p -Value	Pad2.1_GeomeanFold	corrected p-value (Benjamini-Hochberg FDR)
GT_A_84_P197704	AT5G28190	hypothetical protein	3.64339e-06	-5.65598	0.448907
GT_A_84_P301090	AT4G16095	disease resistance protein-related	1.00216e-05	-5.11802	0.427402
GT_A_84_P730385	AT1G08115	ncRNA	0.000195123	-1.21747	0.412433
GT_A_84_P755129	AT2G01960	AT2G01960.1	0.000426257	-6.2247	0.412433
GT_A_84_P585947	AT5G09610	APUM21 (Arabidopsis Pumilio 21); RNA binding / binding	0.000551988	-1.59611	0.370148
GT_A_84_P10555	AT1G53540	17.6 kDa class I small heat shock protein (HSP17.6C-CI) (AA 1-156)	0.00055565	-1.50098	0.222888
GT_A_84_P794288	AT1G08115	AT1G08115.1	0.000605611	-1.15243	0.513041
GT_A_84_P852717		TC307823	0.000668366	-3.38532	0.065475
GT_A_84_P10395	AT1G19050	ARR7 (RESPONSE REGULATOR 7); transcription regulator	0.000943959	-1.08995	0.445021
GT_A_84_P15498	AT3G02620	acyl-(acyl-carrier-protein) desaturase	0.00112048	-4.64092	0.217894
GT_A_84_P601889	AT4G26800	pentatricopeptide (PPR) repeat-containing protein	0.0024386	-1.12802	0.390884
GT_A_84_P15450	AT2G32120	HSP70T-2 (HEAT-SHOCK PROTEIN 70T-2); ATP binding	0.00257233	-1.56799	0.354453
GT_A_84_P545044	AT5G03090	hypothetical protein	0.00271485	-1.79243	0.46079
GT_A_84_P13580	AT3G03400	calmodulin-related protein, putative	0.00336668	-5.53771	0.445021
GT_A_84_P23899	AT2G29500	17.6 kDa class I small heat shock protein (HSP17.6B-CI)	0.00407464	-1.23882	0.0627973
GT_A_84_P550001	AT2G33690	late embryogenesis abundant protein, putative / LEA protein, putative	0.0042587	-3.60552	0.294128
GT_A_84_P582862	AT2G29790	hypothetical protein	0.00443312	-5.17674	0.281231
GT_At_Specific_00092731		AT2G15610	0.00461399	-4.88212	0.237915
GT_A_84_P851702	AT2G01010;AT3G41768	AT2G01010.1	0.00507109	-2.65818	0.412433
GT_A_84_P19732	AT5G51950	glucose-methanol-choline (GMC) oxidoreductase family protein	0.00559812	-1.83537	0.396507
GT_A_84_P825094		TA40791_3702	0.00596651	-1.28689	0.413787
GT_A_84_P17749	AT5G15120	hypothetical protein	0.00680204	-1.93112	0.350898
GT_A_84_P769714	ATCG00920;ATCG01210	ATCG01210.1	0.00768908	-1.79591	0.412433
GT_A_84_P15733	AT4G25590	ADF7 (actin depolymerizing factor 7); actin binding	0.00811781	-2.19721	0.252775
GT_A_84_P195674	AT2G20870	cell wall protein precursor, putative	0.00850904	-1.41702	0.219519
GT_A_84_P805015	AT2G01010;AT3G41768	AT2G01010.1	0.00873216	-2.50904	0.292738
GT_A_84_P15465	AT3G01530	AtMYB57 (myb domain protein 57); DNA binding / transcription factor	0.00924162	-1.46232	0.492282
GT_At_Specific_00246472		AT5G04730	0.0100406	-1.45065	0.281231
GT_A_84_P20428	AT4G13310	CYP71A20; electron carrier/ heme binding / iron ion binding / monooxygenase	0.0102867	-1.90595	0.232777
GT_A_84_P591269	AT5G03920	hypothetical protein	0.0108449	-3.64137	0.387156
GT_A_84_P854475		AT2G01010.1	0.0109793	-1.08577	0.46079
GT_A_84_P844289		TC280876	0.0114172	-1.32678	0.419996
GT_A_84_P159795	AT1G19530	hypothetical protein	0.0114264	-1.33797	0.281231
GT_A_84_P15742	AT4G27450	hypothetical protein	0.0114569	-1.18038	0.416131
GT_A_84_P10439	AT1G09080	BIP3; ATP binding	0.0118343	-2.96353	0.450564
GT_A_84_P737484		ATBAG5 (ARABIDOPSIS THALIANA BCL-2-ASSOCIATED ATHANOGENE 5); protein binding	0.0120778	-1.23368	0.469154
GT_A_84_P157965	AT5G10040	hypothetical protein	0.0124047	-6.57396	0.330684
GT_A_84_P787492	AT5G10040	AT5G10040.1	0.0127007	-7.61808	0.382681
GT_A_84_P840621	AT1G19530	AT1G19530.1	0.0135274	-1.20188	0.415726
GT_A_84_P858221	AT5G51950	AT5G51950.1	0.0135704	-2.01809	0.495344
GT_A_84_P540276	AT2G41905	hypothetical protein	0.0138575	-1.0898	0.471572
GT_A_84_P585973	AT5G17110	hypothetical protein	0.0139279	-3.29779	0.327396
GT_A_84_P160433	AT3G57586		0.0141828	-2.03608	0.475276
GT_A_84_P16734	AT4G38850	SAUR15 (SMALL AUXIN UPREGULATED 15)	0.0143753	-1.60141	0.382681
GT_A_84_P843075	AT1G78160	AT1G78160.1	0.0147947	-3.28251	0.418784
GT_A_84_P758371	AT2G36854	AT2G36854.1	0.0148138	-1.01448	0.419996
GT_A_84_P17283	AT2G14210	AGL44 (AGAMOUS-LIKE 44); DNA binding / transcription factor	0.0150319	-2.86238	0.281231
GT_A_84_P14253	AT1G79400	ATCHX2 (CATION/H+ EXCHANGER 2); monovalent cation:proton antiporter	0.0152148	-1.23538	0.469154
GT_A_84_P310283	AT5G01320	pyruvate decarboxylase, putative	0.0153034	-1.07922	0.419407
GT_A_84_P21940	AT1G58050	helicase domain-containing protein	0.0163683	-3.6537	0.450564
GT_A_84_P11264	AT5G62480	ATGSTU9 (ARABIDOPSIS THALIANA GLUTATHIONE S-TRANSFERASE TAU 9)	0.0165412	-1.28725	0.450564
GT_A_84_P845679	AT2G01010;AT3G41768	AT3G41768.1	0.0168559	-1.13117	0.412433
GT_A_84_P754250	AT1G61226	AT1G61226.1	0.0173177	-3.55601	0.450564
GT_A_84_P10145	AT5G02390	hypothetical protein	0.0173556	-1.38342	0.419407
GT_A_84_P561025	AT5G18340	U-box domain-containing protein	0.0173575	-1.2739	0.463524
GT_A_84_P788781	AT1G09080	AT1G09080.1	0.0182863	-3.04333	0.421791
GT_A_84_P854620		TC309308	0.0184494	-1.96663	0.412433
GT_A_84_P517001	AT1G33055	hypothetical protein	0.0185738	-2.85915	0.382952
GT_A_84_P603821	AT5G39690	ANAC093 (Arabidopsis NAC domain containing protein 93); transcription factor	0.0188495	-6.01602	0.281231
GT_A_84_P849648	AT2G31660	AT2G31660.1	0.0192052	-1.1071	0.281231
GT_A_84_P762406	AT3G24516	AT3G24516.1	0.0202173	-3.47353	0.419407
GT_A_84_P11480	AT1G53480	hypothetical protein	0.0207776	-2.42143	0.466375
GT_A_84_P13791	AT4G09110	zinc finger (C3HC4-type RING finger) family protein	0.0208833	-1.39432	0.281231
GT_A_84_P10793	AT3G23150	ETR2 (ethylene response 2); ethylene binding / glycogen synthase kinase 3	0.0217436	-1.20209	0.450564
GT_A_84_P760050	AT3G47720	AT3G47720.1	0.0224011	-5.12655	0.412433
GT_A_84_P22519	AT5G38130	transferase family protein	0.0224309	-1.53563	0.294128
GT_A_84_P834403	AT4G09150	AT4G09150.1	0.0225343	-1.17108	0.643161
GT_A_84_P18829	AT5G62920	ARR6 (RESPONSE REGULATOR 6); transcription regulator/ two-component response regulator	0.0247969	-1.2492	0.378456
GT_At_Specific_00254373			0.0248454	-1.77946	0.457513
GT_At_Specific_00192635		AT3G61826	0.0248638	-2.45304	0.413787
GT_A_84_P565014	AT2G25770	hypothetical protein	0.0262129	-1.17806	0.448907
GT_A_84_P18985	AT1G11740	ankyrin repeat family protein	0.0265239	-1.04576	0.294128
GT_A_84_P19483	AT4G13560	UNE15 (unfertilized embryo sac 15)	0.0270144	-1.26021	0.412433
GT_A_84_P589734	AT1G13610	hypothetical protein	0.0271702	-1.34982	0.469154
GT_A_84_P19363	AT3G46230	ATHSP17.4	0.027196	-2.3264	0.475276
GT_A_84_P11260	AT5G61610	hypothetical protein	0.0277032	-1.01886	0.281231
GT_A_84_P839073		NP042069	0.0285565	-6.02222	0.170266
GT_A_84_P260410	AT1G78450	SOUL heme-binding family protein	0.0290972	-1.5612	0.448151
GT_A_84_P22274	AT3G63350	AT-HSFA7B; DNA binding / transcription factor	0.0296347	-2.2416	0.435681
GT_A_84_P22953	AT2G25140	CLPB4 (CASEIN LYTIC PROTEINASE B4); ATP binding / ATPase/ nucleoside-triphosphatase	0.0314921	-1.54551	0.281231
GT_A_84_P762701	AT3G56891	AT3G56891.1	0.0324297	-1.04336	0.469154
GT_A_84_P805013	AT2G01010;AT3G41768	AT2G01010.1	0.0330831	-1.28354	0.419407
GT_A_84_P606316	AT4G18090	hypothetical protein	0.0331208	-3.10775	0.445021
GT_A_84_P17578	AT4G10270	wound-responsive family protein	0.0336773	-2.81862	0.232777
GT_A_84_P23846	AT2G47180	AtGolS1 (Arabidopsis thaliana galactinol synthase 1); transferase	0.0336781	-1.08465	0.413787
GT_A_84_P23956	AT1G07350	transformer serine/arginine-rich ribonucleoprotein, putative	0.0342629	-1.03697	0.330684
GT_At_Specific_00084627		AT2G04395	0.0350866	-4.75509	0.437568
GT_A_84_P582090	AT3G18773	zinc finger (C3HC4-type RING finger) family protein	0.0357392	-1.46953	0.46079
GT_A_84_P21323	AT3G62170	VGDH2 (Vanguard 1 homolog 2); enzyme inhibitor/ pectinesterase	0.035819	-3.93275	0.479984
GT_A_84_P23353	AT4G38390	hypothetical protein	0.0359815	-1.3262	0.460784
GT_A_84_P752461	AT1G50330	AT1G50330.1	0.0361514	-5.04037	0.463754
GT_A_84_P853970		TC308800	0.0363269	-1.16638	0.42676
GT_A_84_P511862	AT2G32550	rcd1-like cell differentiation family protein	0.0375364	-1.13521	0.217894
GT_A_84_P787299		BX839886	0.0396552	-2.49171	0.423265
GT_A_84_P501762	AT5G66340	hypothetical protein	0.0401772	-5.36475	0.471572
GT_A_84_P503428	AT5G24105	AGP41 (ARABINOGALACTAN-PROTEIN 41)	0.0402081	-1.07238	0.381351
GT_A_84_P22812	AT1G74890	ARR15 (RESPONSE REGULATOR 15); transcription regulator	0.0402383	-2.85756	0.338418
GT_A_84_P862409		TA27098_3702	0.0405571	-1.32407	0.382681
GT_A_84_P12371	AT1G16510	auxin-responsive family protein	0.0415605	-1.10248	0.457513
GT_A_84_P557326	AT4G10265	wound-responsive protein, putative	0.0425074	-3.85313	0.393886
GT_A_84_P841621		NP227579	0.0426357	-5.51949	0.382952
GT_A_84_P754651	AT1G65484	AT1G65484.1	0.0429283	-4.35545	0.492282
GT_A_84_P857157		BP849794	0.0435376	-3.26849	0.412433
GT_A_84_P813638	AT1G75300	AT1G75300.1	0.044571	-1.22436	0.281231
GT_A_84_P15788	AT4G38840	auxin-responsive protein, putative	0.044583	-1.20878	0.430756
GT_A_84_P13519	AT2G23110	hypothetical protein	0.0446553	-1.03571	0.412433
GT_A_84_P15946	AT5G51440	23.5 kDa mitochondrial small heat shock protein (HSP23.5-M)	0.044755	-1.50869	0.31164
GT_A_84_P17828	AT5G48570	peptidyl-prolyl cis-trans isomerase, putative / FK506-binding protein, putative	0.0448286	-1.83893	0.470059
GT_A_84_P11439	AT1G52560	26.5 kDa class I small heat shock protein-like (HSP26.5-P)	0.0449145	-1.29874	0.489375
GT_A_84_P20057	AT1G63580	protein kinase-related	0.0451669	-1.72453	0.419407
GT_A_84_P524641	AT4G39675	hypothetical protein	0.0451883	-1.06975	0.450564
GT_A_84_P793686		AV781648	0.0453938	-1.04779	0.352961
GT_A_84_P20579	AT5G12020	HSP17.6II (17.6 KDA CLASS II HEAT SHOCK PROTEIN)	0.046256	-1.69243	0.463524
GT_A_84_P91089	AT5G39100	GLP6 (GERMIN-LIKE PROTEIN 6); manganese ion binding / nutrient reservoir	0.0491279	-1.17075	0.431171
GT_A_84_P515906	AT5G46795	MSP2 (microspore-specific promoter 2)	0.0496009	-1.77624	0.448907
GT_A_84_P500185	AT1G63590	receptor-like protein kinase-related	0.0496389	-1.12952	0.450564
GT_A_84_P531386	AT2G34910	hypothetical protein	0.0503994	-1.12553	0.412433
GT_A_84_P12957	AT4G40020	hypothetical protein	0.0507272	-1.0352	0.416131
GT_A_84_P15448	AT2G26820	ATPP2-A3 (Phloem protein 2-A3); carbohydrate binding	0.0511105	-1.18384	0.382952
GT_A_84_P168633	AT3G21930;AT3G21920	pollen coat receptor kinase, putative	0.0512551	-2.10491	0.281231
GT_A_84_P12844	AT4G08630	hypothetical protein	0.0517482	-3.85538	0.141636
GT_A_84_P128141	AT5G39890	hypothetical protein	0.0519292	-2.17656	0.217894
GT_A_84_P756366	AT2G09800	AT2G09800.1	0.0528417	-1.28068	0.0798693
GT_A_84_P564267	AT3G15860	hypothetical protein	0.0531989	-1.06309	0.281231
GT_AntiSense_AtCg00530_283			0.0534669	-1.0051	0.382681
GT_A_84_P23171	AT3G51910	AT-HSFA7A; DNA binding / transcription factor	0.0541693	-1.53594	0.294128
GT_A_84_P285660	AT2G17850	hypothetical protein	0.0548413	-3.29795	0.382681
GT_A_84_P754443	AT1G65642	AT1G65642.1	0.0549588	-1.1293	0.217894
GT_A_84_P846246		TC295887	0.0549771	-1.16636	0.413787
GT_At_Specific_00265690		AT5G23035	0.0552459	-1.30702	0.217894
GT_A_84_P14509	AT2G29120	ATGLR2.7; intracellular ligand-gated ion channel	0.0554865	-1.13148	0.281231
GT_A_84_P597426	AT4G21320	HSA32 (HEAT-STRESS-ASSOCIATED 32); catalytic	0.0556552	-1.8692	0.217894
GT_A_84_P22691	AT1G33770	protein kinase family protein	0.0556586	-1.56762	0.364351
GT_A_84_P512786	AT2G44010	hypothetical protein	0.0563712	-1.39404	0.281231
GT_A_84_P162443	AT5G64510	hypothetical protein	0.0569555	-1.70157	0.217894
GT_A_84_P15534	AT3G21900	receptor-like protein kinase-related	0.0572391	-1.96046	0.217894
GT_A_84_P10728	AT2G29110	ATGLR2.8; intracellular ligand-gated ion channel	0.0574532	-1.1328	0.489375
GT_A_84_P839794		NP173972	0.0584754	-2.76951	0.382681
GT_A_84_P169033	AT1G65970	TPX2 (thioredoxin-dependent peroxidase 2); antioxidant/ oxidoreductase	0.0586098	-2.09621	0.281231
GT_A_84_P856130		AT5G39890.1	0.058711	-2.20388	0.281231
GT_A_84_P22625	AT1G52270	hypothetical protein	0.0589815	-1.46155	0.475276
GT_A_84_P725341	AT1G53490	DNA binding	0.0594713	-1.77599	0.416131
GT_A_84_P81559	AT4G33560	hypothetical protein	0.0596323	-3.08112	0.382952
GT_A_84_P13697	AT3G47870	LBD27 (LOB DOMAIN-CONTAINING PROTEIN 27)	0.0602336	-1.24294	0.450564
GT_A_84_P800048		EG521301	0.0603246	-1.09715	0.323695
GT_A_84_P18190	AT2G16960	importin beta-2 subunit family protein	0.0606632	-1.85298	0.431171
GT_A_84_P162633	AT1G17870	EGY3 (ETHYLENE-DEPENDENT GRAVITROPISM-DEFICIENT AND YELLOW-GREEN-LIKE 3)	0.060992	-1.67791	0.217894
GT_A_84_P558055	AT3G11740	hypothetical protein	0.0612934	-1.28456	0.445021
GT_A_84_P22388	AT4G33070	pyruvate decarboxylase, putative	0.0613012	-1.32932	0.330684
GT_A_84_P11697	AT3G10040	transcription factor	0.0616839	-2.93872	0.281231
GT_A_84_P704033	AT1G11185	miscRNA	0.0618203	-1.14112	0.412433
GT_A_84_P820520	AT1G74940	AT1G74940.1	0.0619452	-1.10646	0.489375
GT_At_Specific_00230407		AT4G30097	0.0622806	-1.30236	0.412433
GT_A_84_P786552	AT2G20870	AT2G20870.1	0.0623999	-1.98523	0.34015
GT_A_84_P21636	AT5G55590	QRT1 (QUARTET 1); pectinesterase	0.0624459	-1.16358	0.396507
GT_A_84_P550637	AT1G18830	transducin family protein / WD-40 repeat family protein	0.0627655	-3.27588	0.281231
GT_A_84_P838654	AT3G47720	AT3G47720.1	0.0629024	-3.78948	0.415726
GT_A_84_P825746	AT4G21320	AT4G21320.1	0.0639145	-1.65969	0.374131
GT_A_84_P11274	AT5G65080	MAF5 (MADS AFFECTING FLOWERING 5); transcription factor	0.0672098	-1.49323	0.415726
GT_A_84_P23460	AT5G36722;AT5G36810	hypothetical protein	0.0675044	-2.68088	0.419407
GT_A_84_P10688	AT1G30070	SGS domain-containing protein	0.0680838	-1.64169	0.480115
GT_A_84_P17379	AT3G09640	APX2 (ASCORBATE PEROXIDASE 2); L-ascorbate peroxidase	0.068126	-1.2627	0.576187
GT_A_84_P13014	AT5G12110	elongation factor 1B alpha-subunit 1 (eEF1Balpha1)	0.0685753	-1.58936	0.412433
GT_A_84_P790466		BX829766	0.0685791	-1.16972	0.382681
GT_A_84_P768186	AT5G43285	AT5G43285.1	0.070128	-1.86056	0.428138
GT_A_84_P18258	AT2G24210	TPS10 (terpene synthase 10); (E)-beta-ocimene synthase/ myrcene synthase	0.0708142	-2.08155	0.217894
GT_A_84_P851319	AT5G59780	AT5G59780.1	0.0716578	-1.95167	0.419407
GT_A_84_P15686	AT4G10250	ATHSP22.0	0.0716917	-1.44047	0.419407
GT_A_84_P834870		TA51728_3702	0.0717231	-1.06782	0.292738
GT_AtCg00630_304			0.0723323	-1.13604	0.354453
GT_A_84_P21815	AT1G05577	hypothetical protein	0.0731041	-1.46921	0.463524
GT_A_84_P13426	AT1G57750	CYP96A15 (CYTOCHROME P450 96 A1); midchain alkane hydroxylase/ oxygen binding	0.0731594	-2.05446	0.445021
GT_A_84_P862741		TC314049	0.0746609	-1.08689	0.323695
GT_A_84_P56650	AT5G41080	glycerophosphoryl diester phosphodiesterase family protein	0.0766459	-1.67803	0.431171
GT_A_84_P300170	AT4G22080	pectate lyase family protein	0.0767006	-1.85025	0.274792
GT_A_84_P65264	AT3G15356	legume lectin family protein	0.0768363	-1.37351	0.460784
GT_A_84_P816061		TA32027_3702	0.0774998	-1.24993	0.217894
GT_A_84_P815721	AT1G19350	AT1G19350.4	0.0778635	-2.12202	0.281231
GT_A_84_P14603	AT3G29810	COBL2 (COBRA-LIKE PROTEIN 2 PRECURSOR)	0.0785652	-1.17745	0.330684
GT_A_84_P556490	AT4G23493	hypothetical protein	0.0806166	-1.7498	0.570198
GT_A_84_P18032	AT1G54050	17.4 kDa class III heat shock protein (HSP17.4-CIII)	0.0818679	-1.85522	0.445021
GT_A_84_P811601		TA29106_3702	0.0832215	-1.31449	0.316957
GT_A_84_P785766	AT5G39580	AT5G39580.1	0.0839712	-1.23377	0.412433
GT_A_84_P810679		TA28660_3702	0.0839992	-1.03562	0.419407
GT_A_84_P768155	AT5G48595	AT5G48595.1	0.0849027	-4.11541	0.430756
GT_A_84_P19534	AT4G29340	PRF4 (PROFILIN 4); actin binding	0.0850141	-1.69649	0.281231
GT_A_84_P16632	AT4G10260	pfkB-type carbohydrate kinase family protein	0.0876183	-2.34798	0.46079
GT_A_84_P17498	AT3G52620	hypothetical protein	0.0878582	-1.17164	0.488188
GT_A_84_P525172	AT2G33720	transcription factor	0.0886148	-1.13423	0.330684
GT_A_84_P857031		TC310803	0.0887424	-1.06809	0.294128
GT_A_84_P12086	AT5G19100	extracellular dermal glycoprotein-related / EDGP-related	0.0887817	-1.27722	0.350898
GT_A_84_P846284		TC296024	0.0888093	-1.14875	0.492282
GT_A_84_P262640	AT5G22430	hypothetical protein	0.0891369	-1.48611	0.547528
GT_A_84_P523311			0.0910831	-1.76629	0.416131
GT_A_84_P16848	AT5G39580	peroxidase, putative	0.0918846	-1.25042	0.52656
GT_A_84_P182564	AT4G21323	subtilase family protein	0.0920052	-1.53376	0.448907
GT_A_84_P138519	AT3G27220	kelch repeat-containing protein	0.0930928	-1.32049	0.46079
GT_A_84_P258460	AT2G47560	zinc finger (C3HC4-type RING finger) family protein	0.0942816	-1.08351	0.382681
GT_A_84_P17884	AT5G63225	hypothetical protein	0.0944911	-4.30801	0.46079
GT_A_84_P598098	AT3G03270	universal stress protein (USP) family protein / early nodulin ENOD18 family protein	0.0946089	-1.08679	0.251565
GT_A_84_P311453	AT3G21930	receptor-like protein kinase-related	0.0953665	-1.63578	0.492282
GT_A_84_P767112	AT5G09590;AT4G32208	AT5G09590.1	0.0956856	-1.23959	0.46079
GT_A_84_P590665	AT1G22220	F-box family protein	0.096174	-1.75175	0.428357
GT_At_Specific_00058459		AT1G61750	0.0970084	-1.09699	0.251565
GT_A_84_P11833	AT3G53830	regulator of chromosome condensation (RCC1) family protein / UVB-resistance protein	0.0970194	-2.28061	0.508636
GT_A_84_P796552		AK229901	0.0979891	-1.25154	0.419407
GT_A_84_P23446	AT5G25390	SHN2 (shine2); DNA binding / transcription factor	0.0982857	-1.26004	0.475276
GT_A_84_P756658	AT2G01010;AT3G41768	AT2G01010.1	0.100188	-1.23394	0.419407
GT_A_84_P21525	AT5G12030	AT-HSP17.6A (ARABIDOPSIS THALIANA HEAT SHOCK PROTEIN 17.6A)	0.101576	-1.76206	0.42676
GT_A_84_P765702	AT4G12617	AT4G12617.1	0.101913	-5.53389	0.403882
GT_A_84_P14417	AT2G20560	DNAJ heat shock family protein	0.102185	-1.70699	0.475276
GT_A_84_P168853	AT3G02550	LBD41 (LOB DOMAIN-CONTAINING PROTEIN 41)	0.102855	-2.12343	0.475276
GT_A_84_P791417	AT2G17850	AT2G17850.1	0.104785	-4.1818	0.252775
GT_A_84_P22462	AT5G09930	ATGCN2; transporter	0.106231	-1.08901	0.252775
GT_A_84_P828333	AT2G29740	AT2G29740.1	0.107288	-1.86725	0.446521
GT_A_84_P838948	AT1G01520	AT1G01520.1	0.108143	-1.18813	0.318974
GT_A_84_P822698		TA37959_3702	0.108447	-5.77034	0.217894
GT_A_84_P548684	AT5G41830	F-box family protein-related	0.109224	-1.24119	0.187156
GT_A_84_P750060	AT1G36680	AT1G36680.1	0.110294	-2.09728	0.00274003
GT_A_84_P828509	AT3G43190	AT3G43190.1	0.111069	-1.66532	0.514333
GT_A_84_P249795	AT2G48130	protease inhibitor/seed storage/lipid transfer protein (LTP) family protein	0.111219	-1.60864	0.42676
GT_A_84_P790164	AT5G41080	AT5G41080.2	0.111719	-1.51163	0.448907
GT_A_84_P578332	AT2G03720	MRH6 (morphogenesis of root hair 6)	0.112754	-1.67448	0.405451
GT_A_84_P753716	AT1G35255	AT1G35255.1	0.112996	-2.69684	0.438047
GT_A_84_P22572	AT5G52640	ATHSP90.1 (HEAT SHOCK PROTEIN 90.1); ATP binding / unfolded protein binding	0.113461	-1.71373	0.469154
GT_At_Specific_00109467			0.113685	-1.85195	0.281231
GT_A_84_P10998	AT4G23570	SGT1A; protein binding	0.11427	-1.27626	0.457513
GT_A_84_P10466	AT1G10460	GLP7 (GERMIN-LIKE PROTEIN 7); manganese ion binding / nutrient reservoir	0.114279	-1.04028	0.450564
GT_A_84_P18292	AT2G28970	leucine-rich repeat protein kinase, putative	0.116001	-1.08089	0.460784
GT_A_84_P15050	AT5G64100	peroxidase, putative	0.116504	-1.7473	0.450564
GT_A_84_P17413	AT3G25230	ROF1 (ROTAMASE FKBP 1); FK506 binding / peptidyl-prolyl cis-trans isomerase	0.11734	-1.18979	0.382952
GT_A_84_P273140	AT5G20670	hypothetical protein	0.119462	-1.30378	0.445021
GT_A_84_P22852	AT1G01520	myb family transcription factor	0.120183	-1.0832	0.450564
GT_A_84_P158275	AT3G26510	octicosapeptide/Phox/Bem1p (PB1) domain-containing protein	0.120298	-1.01335	0.217894
GT_A_84_P10141	AT5G01550	LECRKA4.2 (LECTIN RECEPTOR KINASE A4.1); ATP binding / kinase/ protein kinase	0.123521	-1.00103	0.419996
GT_AtCg00210_146			0.127359	-1.00012	0.281231
GT_A_84_P16958	AT5G15450	CLPB3 (CASEIN LYTIC PROTEINASE B3); ATP binding / ATPase/ nucleoside-triphosphatase	0.12778	-1.08617	0.495817
GT_A_84_P13130	AT5G57220	CYP81F2; electron carrier/ heme binding / iron ion binding / monooxygenase	0.130056	-1.42505	0.463524
GT_A_84_P837793	AT3G45920;AT3G46330	AT3G45920.1	0.130389	-1.70404	0.457513
GT_A_84_P763873	AT4G04293	AT4G04293.1	0.130488	-2.2027	0.448151
GT_A_84_P535673	AT1G61430	S-locus protein kinase, putative	0.131111	-3.38126	0.388217
GT_A_84_P522030	AT5G14110	hypothetical protein	0.132249	-1.22332	0.463524
GT_A_84_P596827	AT2G17690	SDC (SUPPRESSOR OF DRM1 DRM2 CMT3)	0.132298	-1.57638	0.479984
GT_A_84_P14320	AT1G74310	ATHSP101 (ARABIDOPSIS THALIANA HEAT SHOCK PROTEIN 101); ATP binding / ATPase	0.133616	-1.76909	0.450209
GT_A_84_P753286	AT1G31173	AT1G31173.1	0.133659	-1.63027	0.42961
GT_A_84_P826776	AT4G12400	AT4G12400.2	0.134326	-1.48773	0.27811
GT_A_84_P18711	AT5G23970	transferase family protein	0.136578	-2.99761	0.450564
GT_A_84_P853962	AT2G46090	AT2G46090.1	0.137246	-1.01631	0.430756
GT_A_84_P790781		BX836454	0.137408	-1.18801	0.46079
GT_At_Specific_00017312			0.137641	-1.80824	0.338418
GT_A_84_P23870	AT2G47520	AP2 domain-containing transcription factor, putative	0.138575	-1.97713	0.382952
GT_A_84_P855891	AT3G18240	AT3G18240.2	0.138672	-2.43706	0.4245
GT_A_84_P16237	AT1G67000	ATP binding / kinase/ protein kinase/ protein serine/threonine kinase	0.138773	-1.40066	0.281231
GT_A_84_P144289	AT4G29770	hypothetical protein	0.138998	-1.04279	0.430756
GT_A_84_P15731	AT4G25200	ATHSP23.6-MITO (MITOCHONDRION-LOCALIZED SMALL HEAT SHOCK PROTEIN 23.6)	0.139558	-1.48891	0.450564
GT_A_84_P15627	AT3G57020	strictosidine synthase family protein	0.140551	-1.07792	0.44393
GT_A_84_P11914	AT4G12400	stress-inducible protein, putative	0.140778	-1.40384	0.448907
GT_A_84_P271130	AT1G80180	hypothetical protein	0.141229	-1.78395	0.294128
GT_A_84_P12184	AT5G56870	BGAL4 (beta-galactosidase 4); beta-galactosidase	0.141358	-1.32051	0.219519
GT_A_84_P17210	AT1G51890	leucine-rich repeat protein kinase, putative	0.141527	-1.3526	0.500837
GT_A_84_P859300	AT5G52640	AT5G52640.1	0.141988	-1.60959	0.489375
GT_At_Specific_00132469			0.144042	-1.47935	0.457513
GT_A_84_P506433	AT1G72980	LBD7 (LOB DOMAIN-CONTAINING PROTEIN 7)	0.145008	-1.20609	0.435681
GT_A_84_P831446	AT5G17780	AT5G17780.2	0.145152	-1.07069	0.475984
GT_A_84_P12782	AT3G54770	RNA recognition motif (RRM)-containing protein	0.146037	-1.38554	0.469154
GT_A_84_P765859	AT4G31196	AT4G31196.1	0.14661	-4.60099	0.262082
GT_A_84_P14457	AT2G21000		0.147144	-3.52953	0.492282
GT_A_84_P15440	AT1G07400	17.8 kDa class I heat shock protein (HSP17.8-CI)	0.147213	-1.68382	0.281231
GT_A_84_P20298	AT3G43190	SUS4; UDP-glycosyltransferase/ sucrose synthase/ transferase	0.14858	-1.8516	0.350327
GT_A_84_P849455		TA52032_3702	0.148726	-1.3994	0.243138
GT_A_84_P16494	AT3G21870	CYCP2;1 (cyclin p2;1); cyclin-dependent protein kinase	0.149345	-1.04554	0.416131
GT_A_84_P57860	AT1G65490	hypothetical protein	0.149404	-2.06523	0.350898
GT_A_84_P21573	AT5G38120	4-coumarate--CoA ligase family protein / 4-coumaroyl-CoA synthase family protein	0.150296	-1.30242	0.281231
GT_A_84_P565460	AT5G19260	hypothetical protein	0.150402	-1.04479	0.281231
GT_A_84_P23712	AT1G59860	17.6 kDa class I heat shock protein (HSP17.6A-CI)	0.150629	-1.56679	0.445872
GT_A_84_P11492	AT1G78190	hypothetical protein	0.150723	-1.07656	0.281231
GT_A_84_P20706	AT5G59680	leucine-rich repeat protein kinase, putative	0.152572	-1.47102	0.361207
GT_A_84_P555846	AT5G65030	hypothetical protein	0.153149	-1.0175	0.490466
GT_A_84_P531425	AT2G46240	BAG6 (BCL-2-ASSOCIATED ATHANOGENE 6); calmodulin binding / protein binding	0.155116	-1.30614	0.274792
GT_A_84_P534191	AT3G27030	hypothetical protein	0.156871	-1.1149	0.457513
GT_A_84_P854562	AT1G11160	AT1G11160.1	0.157604	-4.57994	0.450564
GT_A_84_P553488	AT2G22180	hydroxyproline-rich glycoprotein family protein	0.157982	-3.07197	0.281231
GT_A_84_P10446	AT1G67100	LBD40 (LOB DOMAIN-CONTAINING PROTEIN 40)	0.158321	-1.40105	0.470059
GT_A_84_P768597	AT5G35698	AT5G35698.1	0.158743	-1.46461	0.419407
GT_A_84_P554154	AT1G13245	RTFL17 (ROTUNDIFOLIA LIKE 17)	0.160019	-1.26125	0.27811
GT_A_84_P537376	AT1G29420	hypothetical protein	0.160109	-2.59937	0.405451
GT_A_84_P803809		DR750565	0.160689	-2.42977	0.459472
GT_A_84_P144479	AT5G47590	heat shock protein-related	0.161859	-1.32967	0.412433
GT_A_84_P10849	AT3G45280	SYP72 (SYNTAXIN OF PLANTS 72); protein transporter	0.162767	-1.19254	0.412433
GT_A_84_P16900	AT5G53820	hypothetical protein	0.163345	-2.46574	0.332328
GT_A_84_P841451	AT3G26510	AT3G26510.2	0.164385	-1.00689	0.292738
GT_AntiSense_AtCg00210_146			0.166623	-1.18808	0.521598
GT_A_84_P847144		TC298883	0.166765	-1.12969	0.405451
GT_A_84_P279060	AT3G12320	hypothetical protein	0.167053	-2.01475	0.450564
GT_At_Specific_00314741			0.167721	-1.42278	0.382952
GT_A_84_P839984	AT1G63580	AT1G63580.1	0.170329	-1.67904	0.51555
GT_A_84_P19247	AT3G07600	heavy-metal-associated domain-containing protein	0.171917	-2.4759	0.274792
GT_At_Specific_00029347		AT1G26916	0.173841	-2.46572	0.382681
GT_A_84_P786180		EG427617	0.174098	-1.74009	0.177522
GT_A_84_P199304	AT1G19610	PDF1.4	0.175336	-1.41849	0.274792
GT_A_84_P23539	AT5G58770	dehydrodolichyl diphosphate synthase, putative / DEDOL-PP synthase, putative	0.175714	-2.1799	0.481701
GT_At_Specific_00313440			0.176088	-1.82768	0.475276
GT_A_84_P233559	AT1G10340	ankyrin repeat family protein	0.176362	-1.19886	0.445639
GT_A_84_P757853	AT2G26692	AT2G26692.1	0.176719	-1.61812	0.428357
GT_A_84_P529136	AT5G22970	hypothetical protein	0.176884	-2.99133	0.445021
GT_A_84_P518129	AT2G44990	CCD7 (CAROTENOID CLEAVAGE DIOXYGENASE 7); 9-cis-epoxycarotenoid dioxygenase	0.177188	-2.78133	0.412433
GT_A_84_P566753	AT2G03830	hypothetical protein	0.177462	-2.30246	0.428357
GT_A_84_P546117	AT5G66985	hypothetical protein	0.177855	-1.30423	0.350898
GT_A_84_P265400	AT2G31110	hypothetical protein	0.180761	-1.07781	0.438047
GT_A_84_P757473	AT2G28560	AT2G28560.2	0.182517	-1.05611	0.450564
GT_A_84_P153835	AT2G21650	MEE3 (MATERNAL EFFECT EMBRYO ARREST 3); DNA binding / transcription factor	0.183573	-1.84959	0.330684
GT_At_Specific_00226768		AT4G27030	0.184883	-1.70676	0.448151
GT_A_84_P12763	AT3G50560	short-chain dehydrogenase/reductase (SDR) family protein	0.185024	-1.74075	0.261246
GT_A_84_P574551	AT1G55580	LAS (Lateral Suppressor); transcription factor	0.185966	-1.02908	0.327396
GT_A_84_P282890	AT5G47610	zinc finger (C3HC4-type RING finger) family protein	0.187151	-1.2541	0.46079
GT_A_84_P145509	AT3G50840	phototropic-responsive NPH3 family protein	0.187966	-1.28501	0.408359
GT_A_84_P815833	AT5G64100	AT5G64100.1	0.1883	-1.33628	0.428357
GT_A_84_P23445	AT5G25140	CYP71B13; electron carrier/ heme binding / iron ion binding / monooxygenase	0.188371	-1.06442	0.382681
GT_A_84_P24130	AT3G54700	carbohydrate transmembrane transporter/ phosphate transmembrane transporter	0.188929	-1.37383	0.452066
GT_A_84_P12663	AT3G02590	delta 7-sterol-C5-desaturase, putative	0.190743	-1.46902	0.357324
GT_A_84_P769781	ATCG00120	ATCG00120.1	0.190847	-1.58949	0.398255
GT_A_84_P14498	AT2G34390	NIP2;1 (NOD26-LIKE INTRINSIC PROTEIN 2;1); lactate transmembrane transporter	0.192496	-2.32181	0.412433
GT_A_84_P16885	AT5G49360	BXL1 (BETA-XYLOSIDASE 1); hydrolase, hydrolyzing O-glycosyl compounds	0.192549	-1.0918	0.469154
GT_A_84_P13449	AT2G29740	UGT71C2 (UDP-GLUCOSYL TRANSFERASE 71C2); UDP-glycosyltransferase	0.192825	-1.37372	0.281231
GT_A_84_P600850	AT3G28540	AAA-type ATPase family protein	0.193253	-1.46172	0.448907
GT_A_84_P754310	AT1G62880	AT1G62880.2	0.194022	-2.96743	0.475943
GT_A_84_P824630	AT5G18290	TA40165_3702	0.194322	-1.52986	0.413787
GT_A_84_P541789	AT1G26250	proline-rich extensin, putative	0.196268	-1.50874	0.469154
GT_At_Specific_00228835		AT4G28775	0.196293	-2.25655	0.428138
GT_A_84_P18034	AT1G78510	SPS1 (solanesyl diphosphate synthase 1); trans-octaprenyltranstransferase	0.196586	-1.336	0.463754
GT_A_84_P721943			0.196753	-1.17764	0.302141
GT_A_84_P10073	AT4G28040	nodulin MtN21 family protein	0.19737	-1.17507	0.431171
GT_A_84_P16867	AT1G66210	subtilase family protein	0.197682	-3.33892	0.00534808
GT_A_84_P11034	AT4G31370	FLA5 (FASCICLIN-LIKE ARABINOGALACTAN PROTEIN 5 PRECURSOR)	0.198678	-1.51684	0.412433
GT_A_84_P10848	AT3G45070	sulfotransferase family protein	0.199117	-2.19301	0.217894
GT_A_84_P821845	AT3G15510	AT3G15510.1	0.199277	-1.92575	0.330684
GT_A_84_P171613	AT5G17500	glycosyl hydrolase family 5 protein / cellulase family protein	0.20038	-1.31158	0.281231
GT_A_84_P529654	AT2G47115	hypothetical protein	0.200996	-1.25454	0.419407
GT_A_84_P23422	AT1G18280	protease inhibitor/seed storage/lipid transfer protein (LTP) family protein	0.200999	-1.7043	0.281231
GT_A_84_P305070	AT2G15020	hypothetical protein	0.201457	-2.42445	0.281231
GT_A_84_P795770		AK221330	0.201574	-1.00682	0.448907
GT_A_84_P10082	AT4G30040	aspartyl protease family	0.201884	-2.75919	0.382681
GT_A_84_P85639	AT3G24190	ABC1 family protein	0.202707	-1.15559	0.450564
GT_A_84_P12960	AT4G14630	GLP9 (GERMIN-LIKE PROTEIN 9); manganese ion binding / nutrient reservoir	0.202899	-1.18297	0.27811
GT_A_84_P849817	AT1G01180	AK228372	0.203768	-1.04621	0.281231
GT_A_84_P826799		TA42809_3702	0.204345	-1.28759	0.416131
GT_A_84_P15740	AT4G27030	small conjugating protein ligase	0.204904	-1.60666	0.488188
GT_A_84_P289314	AT4G15417	ATRTL1 (ARABIDOPSIS THALIANA RNASEIII-LIKE 1); RNA binding / ribonuclease III	0.206617	-1.39831	0.450564
GT_A_84_P526021	AT2G25680	MOT1 (molybdate transporter 1); molybdate ion transmembrane transporter	0.206769	-1.26665	0.419407
GT_AntiSense_AtCg00340_184			0.206863	-1.22124	0.281231
GT_A_84_P108742	AT1G46768	RAP2.1 (related to AP2 1); DNA binding / transcription factor	0.206914	-1.15765	0.222888
GT_A_84_P766685	AT5G07530	AT5G07530.1	0.207636	-2.41593	0.405451
GT_A_84_P792183	AT2G27950	BP815282	0.208188	-1.27664	0.431171
GT_A_84_P13848	AT4G26770	phosphatidate cytidylyltransferase/ transferase	0.208621	-1.8844	0.448151
GT_A_84_P132645	AT2G20670	hypothetical protein	0.210241	-1.1262	0.419407
GT_A_84_P825077	AT1G78510	AT1G78510.2	0.211312	-1.37956	0.380734
GT_A_84_P16942	AT5G64120	peroxidase, putative	0.212065	-1.57022	0.463524
GT_A_84_P16997	AT1G20520	hypothetical protein	0.212115	-2.64107	0.330684
GT_A_84_P11953	AT4G25780	pathogenesis-related protein, putative	0.212971	-1.34807	0.463524
GT_A_84_P18422	AT1G48470	GLN1;5 (glutamine synthetase 1;5); glutamate-ammonia ligase	0.214503	-1.08962	0.281231
GT_A_84_P823929	AT1G03850	AT1G03850.1	0.214807	-1.48919	0.475943
GT_A_84_P22521	AT5G38780	S-adenosyl-L-methionine:carboxyl methyltransferase family protein	0.215695	-1.17152	0.324729
GT_A_84_P117762	AT3G03520	phosphoesterase family protein	0.215955	-1.34139	0.463524
GT_A_84_P768248	AT5G23035	AT5G23035.1	0.216629	-1.44524	0.413787
GT_A_84_P15423	AT2G23620	MES1 (METHYL ESTERASE 1); hydrolase, acting on ester bonds	0.217832	-1.31329	0.477105
GT_A_84_P513046	AT4G25110	AtMC2 (metacaspase 2); cysteine-type endopeptidase	0.218135	-1.23163	0.405451
GT_A_84_P164433	AT4G02920	hypothetical protein	0.21894	-1.01293	0.496868
GT_A_84_P786510		AY050862	0.219788	-1.31918	0.412433
GT_A_84_P12303	AT1G03810	DNA-binding protein-related	0.220332	-3.20649	0.437568
GT_A_84_P577170	AT5G64190	hypothetical protein	0.222431	-1.07511	0.281231
GT_A_84_P500750	AT5G26270	hypothetical protein	0.222466	-1.62013	0.388217
GT_A_84_P850839		AV560012	0.223399	-1.19461	0.475959
GT_A_84_P17327	AT2G34210	structural constituent of ribosome / transcription elongation regulator	0.223723	-2.67218	0.388217
GT_A_84_P137629	AT5G64170	dentin sialophosphoprotein-related	0.225669	-1.49228	0.419407
GT_A_84_P51580	AT1G72060	serine-type endopeptidase inhibitor	0.226317	-1.02904	0.484676
GT_A_84_P846293		TC296025	0.227268	-1.21524	0.380847
GT_A_84_P180414	AT5G55970	zinc finger (C3HC4-type RING finger) family protein	0.227515	-1.17438	0.392651
GT_A_84_P53450	AT1G79770	hypothetical protein	0.227785	-1.18132	0.217894
GT_At_Specific_00195722		AT4G00753	0.228666	-1.59564	0.431171
GT_A_84_P19143	AT1G21050	hypothetical protein	0.229013	-1.17452	0.412433
GT_At_Specific_00313251			0.229179	-1.26197	0.450215
GT_A_84_P126821	AT2G46790	APRR9 (ARABIDOPSIS PSEUDO-RESPONSE REGULATOR 9); protein binding	0.229289	-1.72222	0.437568
GT_A_84_P12424	AT1G01280	CYP703A2 (CYTOCHROME P450, FAMILY 703, SUBFAMILY A, POLYPEPTIDE 2)	0.230052	-3.42181	0.141636
GT_A_84_P68924	AT2G29870	major intrinsic family protein / MIP family protein	0.23053	-2.57092	0.408359
GT_A_84_P149248	AT1G21120	O-methyltransferase, putative	0.231015	-1.05812	0.350898
GT_A_84_P17031	AT1G03850	glutaredoxin family protein	0.232795	-1.44685	0.177522
GT_A_84_P17290	AT2G03740	late embryogenesis abundant domain-containing protein / LEA domain-containing protein	0.232847	-1.71303	0.281231
GT_A_84_P519833	AT2G30520	RPT2 (ROOT PHOTOTROPISM 2); protein binding	0.233394	-1.28666	0.468347
GT_A_84_P760178	AT3G28540	AT3G28540.1	0.233623	-1.41623	0.390884
GT_A_84_P756195	AT2G04070	AT2G04070.1	0.233768	-2.89409	0.394514
GT_A_84_P94969	AT5G06980	hypothetical protein	0.233989	-1.61831	0.463524
GT_A_84_P869924	AT4G26580	AT4G26580.1	0.234005	-1.00385	0.388217
GT_A_84_P232159	AT2G32530	ATCSLB03; cellulose synthase/ transferase/ transferase, transferring glycosyl groups	0.235631	-1.95693	0.512379
GT_A_84_P191914	AT2G21320	zinc finger (B-box type) family protein	0.236256	-2.4806	0.313354
GT_A_84_P12850	AT4G10200	hAT dimerisation domain-containing protein / transposase-related	0.236406	-1.09655	0.281231
GT_A_84_P123582	AT5G18290	SIP1;2; water channel	0.237639	-1.25099	0.281231
GT_A_84_P11649	AT2G19590	ACO1 (ACC OXIDASE 1); 1-aminocyclopropane-1-carboxylate oxidase	0.237755	-1.01151	0.481701
GT_A_84_P784866	AT1G15550	AT1G15550.1	0.238439	-1.61459	0.219519
GT_A_84_P849261		DR271954	0.238565	-1.66166	0.281231
GT_A_84_P205498	AT1G63060	hypothetical protein	0.240063	-1.9436	0.252775
GT_A_84_P12750	AT3G47430	PEX11B	0.240293	-1.41747	0.382952
GT_A_84_P14281	AT1G15550	GA3OX1 (GIBBERELLIN 3-OXIDASE 1); gibberellin 3-beta-dioxygenase	0.243149	-1.60719	0.475276
GT_A_84_P21575	AT5G38760	hypothetical protein	0.243925	-2.89666	0.301793
GT_A_84_P835531	AT5G64170	AT5G64170.2	0.24745	-1.64542	0.450564
GT_A_84_P14249	AT1G36060	AP2 domain-containing transcription factor, putative	0.247739	-1.35282	0.405451
GT_A_84_P19915	AT1G22760	PAB3 (POLY(A) BINDING PROTEIN 3); RNA binding / translation initiation factor	0.247863	-2.40163	0.46079
GT_A_84_P762845	AT3G13061	AT3G13061.1	0.248653	-1.02883	0.431171
GT_A_84_P805673		TA26114_3702	0.250228	-1.0611	0.471572
GT_A_84_P19241	AT2G46830	CCA1 (CIRCADIAN CLOCK ASSOCIATED 1); DNA binding / transcription activator	0.250269	-2.31791	0.412433
GT_A_84_P769565	AT5G44585	AT5G44585.1	0.250693	-1.79415	0.428138
GT_A_84_P753488	AT1G13448	AT1G13448.1	0.250814	-1.44593	0.463524
GT_A_84_P10038	AT4G20050	QRT3 (QUARTET 3); polygalacturonase	0.251621	-1.39495	0.418784
GT_A_84_P574834	AT2G31985	hypothetical protein	0.251995	-1.27806	0.457513
GT_At_Specific_00175850			0.252537	-1.33649	0.350898
GT_A_84_P17279	AT2G25090	CIPK16 (CBL-INTERACTING PROTEIN KINASE 16); ATP binding / kinase/ protein kinase	0.252902	-1.65276	0.382952
GT_A_84_P750006	AT1G75250	AT1G75250.1	0.254217	-1.02281	0.42961
GT_A_84_P291034	AT5G09500	40S ribosomal protein S15 (RPS15C)	0.255117	-2.34134	0.27811
GT_A_84_P802547	AT3G27690	DR223395	0.255541	-1.95177	0.177522
GT_A_84_P24042	AT3G26210	CYP71B23; electron carrier/ heme binding / iron ion binding / monooxygenase	0.256594	-1.33491	0.0627973
GT_A_84_P242573	AT5G54470	zinc finger (B-box type) family protein	0.256875	-1.33724	0.217894
GT_A_84_P789631		AV820102	0.258774	-1.28805	0.448151
GT_A_84_P833267	AT4G02850	AT4G02850.1	0.259045	-1.12757	0.258467
GT_A_84_P267250	AT5G44190	GLK2 (GOLDEN2-LIKE 2); DNA binding / transcription factor/ transcription regulator	0.259273	-1.21759	0.330684
GT_A_84_P18976	AT1G30730	FAD-binding domain-containing protein	0.259309	-1.75587	0.46079
GT_At_Specific_00025460			0.260078	-1.99679	0.217894
GT_A_84_P21046	AT2G38600	acid phosphatase class B family protein	0.261482	-1.38033	0.463524
GT_A_84_P802894	AT2G26080	AT2G26080.1	0.262062	-1.44905	0.464086
GT_A_84_P581126	AT2G46790;AT2G46670	pseudo-response regulator, putative / timing of CAB expression 1-like protein, putative	0.262979	-1.03907	0.536115
GT_A_84_P863069		TA26666_3702	0.263013	-2.0611	0.448907
GT_A_84_P216708	AT2G42975	hypothetical protein	0.264273	-1.42685	0.381351
GT_A_84_P18161	AT1G49920	zinc finger protein-related	0.264488	-1.5474	0.281231
GT_A_84_P14542	AT3G09600	myb family transcription factor	0.26529	-1.43687	0.330684
GT_A_84_P75404	AT5G55150	F-box family protein	0.267244	-1.72706	0.460784
GT_A_84_P830995	AT3G45130	AT3G45130.1	0.267447	-1.69329	0.412433
GT_A_84_P21360	AT1G69570	Dof-type zinc finger domain-containing protein	0.267762	-1.51434	0.141636
GT_A_84_P541229	AT3G13062	hypothetical protein	0.269401	-1.02834	0.505263
GT_A_84_P812448		AT4G26850.1	0.269557	-1.25093	0.437568
GT_A_84_P166653	AT1G07010	calcineurin-like phosphoesterase family protein	0.271207	-1.35452	0.222888
GT_A_84_P15284	AT1G42560	MLO9 (MILDEW RESISTANCE LOCUS O 9); calmodulin binding	0.271364	-1.69338	0.274792
GT_A_84_P519046	AT3G09450	hypothetical protein	0.271848	-1.69806	0.463524
GT_A_84_P844676		TC284000	0.27194	-1.20429	0.46079
GT_A_84_P571367	AT3G08490	hypothetical protein	0.272684	-3.22247	0.469154
GT_A_84_P300490	AT4G26850	VTC2 (vitamin c defective 2); GDP-D-glucose phosphorylase	0.272927	-1.17259	0.307133
GT_A_84_P17513	AT3G55580	regulator of chromosome condensation (RCC1) family protein	0.273443	-1.61216	0.463524
GT_A_84_P818172	AT1G15040	AT1G15040.1	0.275237	-1.81966	0.419407
GT_A_84_P766690	AT5G07550	AT5G07550.1	0.27652	-3.31062	0.281231
GT_A_84_P220868	AT2G17740	DC1 domain-containing protein	0.277659	-2.37823	0.489966
GT_A_84_P136665	AT4G15430	hypothetical protein	0.279706	-1.30247	0.437568
GT_A_84_P542646	AT1G15040	glutamine amidotransferase-related	0.281442	-1.85684	0.457513
GT_A_84_P827598	AT1G72130	AT1G72130.2	0.281478	-1.02346	0.412433
GT_A_84_P836756	AT3G43190	AT3G43190.1	0.281593	-1.33544	0.450564
GT_A_84_P750651	AT1G59920;AT1G59930	AT1G59930.1	0.281933	-1.56598	0.281231
GT_A_84_P71314	AT1G54860	hypothetical protein	0.282145	-1.29385	0.450564
GT_A_84_P603601	AT4G02850	phenazine biosynthesis PhzC/PhzF family protein	0.283988	-1.09182	0.46079
GT_A_84_P20019	AT1G17960	threonyl-tRNA synthetase, putative / threonine--tRNA ligase, putative	0.284011	-1.04511	0.463524
GT_A_84_P529752	AT3G28960	amino acid transporter family protein	0.284548	-1.10368	0.031392
GT_A_84_P13983	AT5G24120	SIGE (SIGMA FACTOR E); DNA binding / DNA-directed RNA polymerase/ sigma factor	0.285633	-1.83076	0.217894
GT_A_84_P250035	AT2G41250	haloacid dehalogenase-like hydrolase family protein	0.286452	-1.92915	0.427806
GT_A_84_P786032	AT4G26850	AT4G26850.1	0.28682	-1.13642	0.350898
GT_A_84_P850374		TC304905	0.290157	-2.36475	0.479984
GT_A_84_P21735	AT1G12370	PHR1 (PHOTOLYASE 1); DNA photolyase	0.291064	-1.14783	0.437568
GT_A_84_P13789	AT4G08670	protease inhibitor/seed storage/lipid transfer protein (LTP) family protein	0.294528	-1.70109	0.27811
GT_A_84_P20419	AT1G06280	LBD2 (LOB DOMAIN-CONTAINING PROTEIN 2)	0.295373	-3.05776	0.382681
GT_A_84_P18030	AT1G30720	FAD-binding domain-containing protein	0.296438	-1.62291	0.427806
GT_A_84_P24070	AT3G27170	CLC-B (CHLORIDE CHANNEL B); anion channel/ voltage-gated chloride channel	0.297321	-1.73621	0.350898
GT_A_84_P16823	AT1G01060	LHY (LATE ELONGATED HYPOCOTYL); DNA binding / transcription factor	0.297855	-2.59318	0.430756
GT_A_84_P10505	AT1G78290	serine/threonine protein kinase, putative	0.297969	-1.60432	0.486183
GT_A_84_P854842	AT3G13225	AT3G13225.1	0.298634	-1.31341	0.222888
GT_A_84_P10434	AT1G70250	receptor serine/threonine kinase, putative	0.298751	-1.25461	0.412433
GT_A_84_P17492	AT3G51060	STY1 (STYLISH 1); protein heterodimerization/ transcription factor	0.298945	-2.53842	0.457513
GT_A_84_P24034	AT3G17760	GAD5 (glutamate decarboxylase 5); calmodulin binding	0.300265	-1.37632	0.281231
GT_A_84_P22729	AT1G09880	lyase	0.300921	-1.53012	0.281231
GT_A_84_P19525	AT4G27310	zinc finger (B-box type) family protein	0.301684	-1.59373	0.0627973
GT_A_84_P519104	AT3G25717	RTFL16 (ROTUNDIFOLIA LIKE 16)	0.30343	-1.36844	0.419407
GT_A_84_P586318	AT1G65845	hypothetical protein	0.30361	-1.6037	0.463524
GT_A_84_P852521	AT1G78290	AT1G78290.2	0.303881	-1.64662	0.281231
GT_A_84_P20703	AT5G59170	proline-rich family protein	0.307016	-1.06306	0.335302
GT_A_84_P136115	AT1G75750	GASA1 (GAST1 PROTEIN HOMOLOG 1)	0.307075	-1.69333	0.410592
GT_A_84_P258870	AT1G72130	proton-dependent oligopeptide transport (POT) family protein	0.308337	-1.00933	0.463524
GT_A_84_P10011	AT4G09350	DNAJ heat shock N-terminal domain-containing protein	0.309549	-1.06591	0.405451
GT_A_84_P217918	AT1G71970	hypothetical protein	0.310448	-1.31619	0.495817
GT_A_84_P94599	AT3G56290	hypothetical protein	0.311967	-2.19407	0.585883
GT_At_Specific_00205563		AT4G09750	0.312335	-1.0666	0.219519
GT_At_Specific_00073965			0.312339	-1.8023	0.237915
GT_A_84_P285960	AT5G52910	ATIM (TIMELESS)	0.312566	-1.17657	0.419407
GT_A_84_P153128	AT4G16980	arabinogalactan-protein family	0.313951	-1.01442	0.232673
GT_A_84_P18533	AT4G12470	protease inhibitor/seed storage/lipid transfer protein (LTP) family protein	0.314058	-2.04948	0.274792
GT_A_84_P503876	AT2G27660	DC1 domain-containing protein	0.314661	-1.20254	0.42676
GT_A_84_P595192	AT1G55475	hypothetical protein	0.314796	-3.28026	0.378456
GT_A_84_P19925	AT1G03020	glutaredoxin family protein	0.314832	-1.11265	0.460784
GT_A_84_P796287		BT025690	0.315519	-2.50862	0.48895
GT_A_84_P847314	AT2G46830	AT2G46830.1	0.316766	-2.08108	0.459472
GT_A_84_P133465	AT2G40400	hypothetical protein	0.317023	-1.22041	0.339277
GT_A_84_P541962	AT2G16385	hypothetical protein	0.317523	-2.25682	0.382952
GT_A_84_P20887	AT1G17050	SPS2 (Solanesyl diphosphate synthase 2); trans-octaprenyltranstransferase	0.318113	-1.03479	0.457172
GT_A_84_P820018		AT3G54500.1	0.318154	-1.72588	0.462108
GT_A_84_P825453		TA41237_3702	0.320395	-1.35034	0.413787
GT_A_84_P786842		AV785236	0.321187	-1.86677	0.433915
GT_A_84_P217328	AT4G05070	hypothetical protein	0.322196	-1.07402	0.479984
GT_A_84_P12958	AT4G14080	MEE48 (maternal effect embryo arrest 48); catalytic/ cation binding / hydrolase	0.322374	-4.67075	0.330684
GT_A_84_P566577	AT1G16730	hypothetical protein	0.322703	-1.18405	0.318974
GT_A_84_P869667	AT2G41250	AT2G41250.1	0.323248	-1.84348	0.294128
GT_A_84_P786892	AT2G41250	AT2G41250.1	0.324621	-1.77953	0.416131
GT_A_84_P23142	AT3G45260	zinc finger (C2H2 type) family protein	0.32574	-1.08471	0.392651
GT_A_84_P16630	AT4G09750	short-chain dehydrogenase/reductase (SDR) family protein	0.325877	-1.07375	0.471572
GT_A_84_P50780	AT5G67370	hypothetical protein	0.326365	-1.06281	0.46079
GT_A_84_P835975		TA52263_3702	0.326585	-1.92462	0.42676
GT_A_84_P256030	AT5G52460	EDA41 (embryo sac development arrest 41)	0.327185	-3.49956	0.53914
GT_A_84_P795986		DR283729	0.328096	-1.80057	0.217894
GT_A_84_P724814			0.329944	-2.07687	0.412433
GT_A_84_P847991	AT2G46830	AT2G46830.1	0.331011	-1.98071	0.457513
GT_A_84_P153388	AT3G29787		0.331594	-1.12517	0.419996
GT_A_84_P12595	AT2G32610	ATCSLB01; cellulose synthase/ transferase/ transferase, transferring glycosyl groups	0.333072	-1.62527	0.316957
GT_A_84_P20292	AT3G02380	COL2 (constans-like 2); transcription factor/ zinc ion binding	0.33355	-2.37855	0.440125
GT_At_Specific_00176873			0.333705	-1.0639	0.405451
GT_A_84_P20152	AT2G23540	GDSL-motif lipase/hydrolase family protein	0.333856	-1.09858	0.418784
GT_A_84_P12560	AT2G31380	STH; protein domain specific binding / transcription factor/ zinc ion binding	0.334354	-1.27816	0.281231
GT_A_84_P726299			0.334733	-1.77521	0.450564
GT_A_84_P11805	AT3G47420	glycerol-3-phosphate transporter, putative / glycerol 3-phosphate permease, putative	0.334824	-1.29409	0.450564
GT_A_84_P20425	AT4G12480	pEARLI 1; lipid binding	0.335769	-2.13186	0.281231
GT_A_84_P842001	AT5G55570	AT5G55570.1	0.336078	-2.08111	0.217894
GT_A_84_P817501		TA33162_3702	0.336622	-1.19318	0.222888
GT_A_84_P150068	AT2G43140	DNA binding / transcription factor	0.336645	-1.08866	0.472707
GT_A_84_P839921	AT1G64563	NP184090	0.336833	-1.87625	0.428357
GT_A_84_P514754	AT4G02810	hypothetical protein	0.337013	-1.27945	0.350898
GT_A_84_P23614	AT2G07738	hypothetical protein	0.33769	-1.59912	0.292738
GT_A_84_P12666	AT3G15510	ATNAC2 (ARABIDOPSIS NAC DOMAIN CONTAINING PROTEIN 2); transcription factor	0.338123	-1.2922	0.382681
GT_A_84_P838280		TA53443_3702	0.339611	-1.9562	0.343116
GT_A_84_P21330	AT3G44900	ATCHX4 (CATION/H+ EXCHANGER 4); monovalent cation:proton antiporter	0.340503	-1.05232	0.413787
GT_A_84_P271630	AT1G44446	CH1 (CHLORINA 1); chlorophyllide a oxygenase	0.342995	-1.3644	0.50293
GT_A_84_P859689		AT1G75750.1	0.344369	-1.50359	0.281231
GT_A_84_P765883	AT4G13575	AT4G13575.1	0.34773	-1.34256	0.0627973
GT_A_84_P824802	AT2G44370	AT2G44370.1	0.34962	-1.45867	0.475276
GT_A_84_P720290	AT1G53633	hypothetical protein	0.349904	-1.13644	0.509033
GT_A_84_P843020	AT1G07010	AT1G07010.2	0.35113	-1.00039	0.412433
GT_A_84_P22019	AT2G44390	DC1 domain-containing protein	0.351897	-1.56455	0.450564
GT_A_84_P14446	AT2G19190	FRK1 (FLG22-INDUCED RECEPTOR-LIKE KINASE 1); kinase	0.352138	-1.62987	0.448907
GT_A_84_P13200	AT1G51820	leucine-rich repeat protein kinase, putative	0.352518	-1.37934	0.335302
GT_A_84_P230389	AT3G21080	ABC transporter-related	0.352619	-1.71729	0.281231
GT_At_Specific_00107099		AT2G27660	0.352947	-1.09541	0.554518
GT_A_84_P577620	AT3G13435	hypothetical protein	0.35297	-1.13826	0.569426
GT_A_84_P206918	AT1G75100	JAC1 (J-DOMAIN PROTEIN REQUIRED FOR CHLOROPLAST ACCUMULATION RESPONSE 1)	0.353662	-1.39876	0.428138
GT_A_84_P814783	AT2G30520	AT2G30520.2	0.355133	-1.0715	0.42961
GT_A_84_P20119	AT2G02720	pectate lyase family protein	0.35585	-1.71623	0.392651
GT_A_84_P842628		NP281291	0.356295	-2.15464	0.274792
GT_At_Specific_00295915			0.357223	-1.02067	0.217894
GT_A_84_P754435	AT1G65486	AT1G65486.1	0.357496	-1.41619	0.42676
GT_A_84_P77129	AT2G44370	DC1 domain-containing protein	0.357666	-1.46098	0.46079
GT_A_84_P765572	AT4G13495;AT4G13494	AT4G13494.1	0.360035	-1.44218	0.470059
GT_A_84_P23402	AT5G07550	GRP19 (GLYCINE-RICH PROTEIN 19); lipid binding	0.360771	-3.39576	0.318974
GT_A_84_P17628	AT4G26200	ACS7; 1-aminocyclopropane-1-carboxylate synthase	0.363874	-1.18436	0.316957
GT_A_84_P765181	AT4G13495	AT4G13495.2	0.36505	-1.28976	0.431171
GT_A_84_P599886	AT3G06145	hypothetical protein	0.365076	-1.13878	0.460784
GT_A_84_P813613	AT4G32940	AT4G32940.1	0.365259	-1.19484	0.281231
GT_A_84_P833888	AT4G13495	AT4G13495.2	0.365793	-1.3201	0.457513
GT_A_84_P14108	AT5G64940	ATATH13; transporter	0.36631	-1.13025	0.281231
GT_A_84_P20159	AT2G32540	ATCSLB04; cellulose synthase/ transferase/ transferase, transferring glycosyl groups	0.366507	-1.76459	0.306342
GT_A_84_P18763	AT5G45820	CIPK20 (CBL-INTERACTING PROTEIN KINASE 20); kinase/ protein serine/threonine kinase	0.367014	-1.24379	0.412433
GT_A_84_P850182		TC304561	0.367299	-1.82629	0.310382
GT_A_84_P591022	AT3G21530	endonuclease/exonuclease/phosphatase family protein	0.368195	-1.16031	0.498903
GT_A_84_P92299	AT1G73010	phosphatase	0.368356	-1.06996	0.472948
GT_A_84_P181994	AT3G02040	SRG3 (senescence-related gene 3); glycerophosphodiester phosphodiesterase	0.368801	-1.59021	0.450564
GT_A_84_P769417	AT5G41761	AT5G41761.1	0.371353	-1.4072	0.433915
GT_A_84_P21510	AT5G07530	GRP17 (GLYCINE RICH PROTEIN 17); lipid binding	0.371956	-1.6044	0.450209
GT_A_84_P264320	AT1G58280	hypothetical protein	0.374916	-1.45012	0.492282
GT_A_84_P828432	AT1G58280	AT1G58280.2	0.37497	-1.33846	0.281231
GT_At_Specific_00190113		AT3G59778	0.375322	-1.52331	0.412433
GT_A_84_P10477	AT1G13080	CYP71B2 (CYTOCHROME P450 71B2); electron carrier/ heme binding / iron ion binding	0.376218	-1.42861	0.350898
GT_A_84_P11644	AT2G37460	nodulin MtN21 family protein	0.376941	-1.6277	0.416131
GT_A_84_P189364	AT3G57690	AGP23 (ARABINOGALACTAN-PROTEIN 23)	0.377057	-2.53071	0.412433
GT_A_84_P728892	AT3G45300	IVD (ISOVALERYL-COA-DEHYDROGENASE); ATP binding / isovaleryl-CoA dehydrogenase	0.377595	-1.07394	0.457513
GT_A_84_P567338	AT5G55570	hypothetical protein	0.377624	-1.77557	0.413787
GT_A_84_P18656	AT5G02780	In2-1 protein, putative	0.377703	-1.56604	0.198804
GT_A_84_P808697	AT2G05100	AT2G05100.1	0.378257	-2.80697	0.450215
GT_A_84_P13990	AT5G26010	catalytic/ protein serine/threonine phosphatase	0.378435	-1.37522	0.282419
GT_A_84_P766211	AT5G35490	AT5G35490.1	0.379888	-2.12274	0.38139
GT_A_84_P62840	AT4G14690	ELIP2 (EARLY LIGHT-INDUCIBLE PROTEIN 2); chlorophyll binding	0.38054	-1.05339	0.412433
GT_A_84_P729644			0.382732	-1.79092	0.435681
GT_A_84_P12696	AT1G26790	Dof-type zinc finger domain-containing protein	0.383727	-2.05366	0.350898
GT_A_84_P555663	AT5G03545	hypothetical protein	0.385003	-1.27101	0.46079
GT_A_84_P17442	AT3G26320	CYP71B36; electron carrier/ heme binding / iron ion binding / monooxygenase	0.385119	-1.43719	0.350898
GT_A_84_P67544			0.38783	-1.00401	0.484676
GT_A_84_P208048	AT5G44580	hypothetical protein	0.389253	-1.05551	0.488188
GT_A_84_P577078	AT5G35480	hypothetical protein	0.389295	-1.92338	0.430756
GT_A_84_P757673	AT2G04031	AT2G04031.1	0.389442	-1.66254	0.382952
GT_A_84_P522223	AT5G25290	F-box family protein	0.390331	-2.19847	0.470059
GT_A_84_P15266	AT1G74460	GDSL-motif lipase/hydrolase family protein	0.390586	-1.06321	0.587293
GT_A_84_P20656	AT5G46050	PTR3 (PEPTIDE TRANSPORTER 3); dipeptide transporter/ transporter	0.390932	-1.01998	0.428357
GT_A_84_P524292	AT2G32530	ATCSLB03; cellulose synthase/ transferase/ transferase, transferring glycosyl groups	0.391666	-1.09606	0.492282
GT_A_84_P756272	AT2G27395	AT2G27395.1	0.391862	-3.71645	0.46079
GT_A_84_P591602	AT1G36640	hypothetical protein	0.392037	-1.2377	0.237915
GT_A_84_P297414	AT3G62070	hypothetical protein	0.392248	-1.51475	0.475959
GT_A_84_P84119	AT1G13770	hypothetical protein	0.392636	-1.01458	0.294128
GT_A_84_P613251	AT3G18250	hypothetical protein	0.393279	-1.00711	0.42676
GT_A_84_P525395	AT4G02075	PIT1 (pitchoun 1); protein binding / zinc ion binding	0.393624	-1.72338	0.450564
GT_A_84_P14218	AT1G65610	KOR2; catalytic/ hydrolase, hydrolyzing O-glycosyl compounds	0.394941	-1.35074	0.435681
GT_A_84_P59200	AT3G14040	exopolygalacturonase / galacturan 1,4-alpha-galacturonidase / pectinase	0.395468	-3.90245	0.470006
GT_At_Specific_00291169		AT5G48780	0.396818	-1.7543	0.378456
GT_A_84_P12884	AT4G22570	APT3 (ADENINE PHOSPHORIBOSYL TRANSFERASE 3); adenine phosphoribosyltransferase	0.399169	-1.16465	0.450624
GT_At_Specific_00149243		AT3G15548	0.400377	-2.18219	0.281231
GT_A_84_P551331	AT5G42655	hypothetical protein	0.401329	-1.48583	0.350898
GT_A_84_P851088		AT4G38960.1	0.402093	-1.11183	0.260141
GT_A_84_P13748	AT3G59740	receptor lectin kinase 3 (lecRK3)	0.404102	-1.27728	0.281231
GT_A_84_P64944	AT4G00960	protein kinase family protein	0.405244	-1.40945	0.450564
GT_A_84_P20023	AT1G07180	NDA1 (ALTERNATIVE NAD(P)H DEHYDROGENASE 1); NADH dehydrogenase	0.405731	-1.37387	0.403882
GT_A_84_P842737	AT3G29330	AT3G29330.1	0.406134	-1.0218	0.217894
GT_A_84_P222669	AT1G76930	ATEXT4 (EXTENSIN 4); structural constituent of cell wall	0.406323	-1.45955	0.463754
GT_A_84_P290194	AT2G13660	hypothetical protein	0.407917	-1.72535	0.394919
GT_A_84_P13494	AT2G36690	oxidoreductase, 2OG-Fe(II) oxygenase family protein	0.40888	-2.61532	0.281231
GT_A_84_P837084	AT1G58280	AT1G58280.1	0.409106	-1.14544	0.601689
GT_A_84_P11819	AT3G50740	UGT72E1 (UDP-glucosyl transferase 72E1); coniferyl-alcohol glucosyltransferase	0.409133	-1.00212	0.475276
GT_A_84_P12395	AT1G32900	starch synthase, putative	0.409542	-2.20626	0.450564
GT_A_84_P284920	AT3G01060	hypothetical protein	0.409882	-1.23837	0.457513
GT_A_84_P23183	AT1G42430	hypothetical protein	0.410091	-1.09298	0.477105
GT_A_84_P14701	AT3G61880	CYP78A9 (CYTOCHROME P450 78A9); monooxygenase/ oxygen binding	0.411764	-1.11892	0.469154
GT_A_84_P832916	AT2G44380	AT2G44380.1	0.411787	-1.34434	0.457513
GT_A_84_P808706	AT3G27690	AT3G27690.1	0.412057	-1.28592	0.217894
GT_A_84_P12008	AT4G38960	zinc finger (B-box type) family protein	0.415216	-1.21723	0.217894
GT_A_84_P768923	AT5G44574	AT5G44574.1	0.418058	-1.14502	0.431171
GT_A_84_P14315	AT1G02580	MEA (MEDEA); sequence-specific DNA binding / transcription factor	0.418531	-2.87345	0.219519
GT_A_84_P571397	AT3G15930	pentatricopeptide (PPR) repeat-containing protein	0.418837	-1.08583	0.281231
GT_A_84_P868534	AT3G01060	AT3G01060.1	0.419106	-1.21023	0.323695
GT_A_84_P789523	AT5G03545	AT5G03545.1	0.41997	-1.1785	0.419407
GT_A_84_P817496	AT1G55960	AT1G55960.1	0.420768	-1.81116	0.401602
GT_A_84_P19158	AT2G41290	strictosidine synthase family protein	0.422274	-1.27916	0.531899
GT_A_84_P19248	AT3G01550	PPT2 (PHOSPHOENOLPYRUVATE (PEP)/PHOSPHATE TRANSLOCATOR 2); antiporter	0.424358	-1.28195	0.448907
GT_A_84_P13503	AT2G34960	CAT5 (CATIONIC AMINO ACID TRANSPORTER 5); L-glutamate transmembrane transporter	0.426611	-1.4831	0.450564
GT_A_84_P863936	AT1G76930	AT1G76930.1	0.42795	-1.06519	0.419407
GT_A_84_P16440	AT3G04140	ankyrin repeat family protein	0.428409	-1.0789	0.382952
GT_A_84_P565934	AT2G34010	hypothetical protein	0.428822	-1.36342	0.222888
GT_A_84_P24021	AT3G27690	LHCB2.3; chlorophyll binding	0.429012	-1.20449	0.412433
GT_A_84_P841901	AT5G35490	AT5G35490.1	0.429454	-1.80632	0.46079
GT_A_84_P19318	AT3G22060	receptor protein kinase-related	0.430071	-1.0886	0.440871
GT_A_84_P794661	AT4G36480	AT4G36480.1	0.430439	-1.49359	0.418784
GT_A_84_P12117	AT1G55960	hypothetical protein	0.430796	-1.76431	0.467402
GT_A_84_P288490	AT2G05070	LHCB2.2; chlorophyll binding	0.431481	-1.19322	0.294128
GT_A_84_P524838	AT5G66740	hypothetical protein	0.431584	-1.22196	0.187156
GT_A_84_P834445	AT4G07410	AT4G07410.2	0.434664	-1.18023	0.448151
GT_A_84_P533868	AT1G49000	hypothetical protein	0.434791	-1.41131	0.0627973
GT_A_84_P52840	AT3G54500	hypothetical protein	0.434977	-1.51599	0.382681
GT_A_84_P221276	AT5G22390	hypothetical protein	0.435088	-1.40323	0.279272
GT_A_84_P842639		NP281434	0.437132	-1.2138	0.217894
GT_A_84_P766757	AT5G07410	AT5G07410.1	0.441766	-2.22449	0.390884
GT_A_84_P20866	AT1G04250	AXR3 (AUXIN RESISTANT 3); transcription factor	0.441972	-1.07983	0.222888
GT_A_84_P13997	AT5G28020	CYSD2 (CYSTEINE SYNTHASE D2); catalytic/ cysteine synthase/ pyridoxal phosphate binding	0.442734	-1.34136	0.445021
GT_A_84_P750646	AT1G59920;AT1G59930	AT1G59920.1	0.443221	-1.16325	0.511736
GT_A_84_P23983	AT3G03430	polcalcin, putative / calcium-binding pollen allergen, putative	0.44499	-1.39585	0.382681
GT_A_84_P17111	AT1G02820	late embryogenesis abundant 3 family protein / LEA3 family protein	0.445068	-1.27724	0.281231
GT_A_84_P861351		AT3G28980.1	0.445601	-2.15817	0.413787
GT_A_84_P559896	AT3G44450	hypothetical protein	0.447768	-1.10131	0.517661
GT_A_84_P830096	AT5G44575	AT5G44575.1	0.450129	-1.80385	0.329065
GT_A_84_P534865	AT2G12170	hypothetical protein	0.450511	-1.25097	0.281231
GT_A_84_P754199	AT1G67328	AT1G67328.1	0.453722	-1.09959	0.217894
GT_A_84_P830960	AT3G63180	AT3G63180.2	0.457063	-1.7951	0.382681
GT_A_84_P513687	AT2G47540	pollen Ole e 1 allergen and extensin family protein	0.458097	-1.5293	0.452357
GT_A_84_P182054	AT5G37690	GDSL-motif lipase/hydrolase family protein	0.458139	-1.43249	0.481539
GT_A_84_P765568	AT4G13493	AT4G13493.1	0.458438	-1.10596	0.281231
GT_A_84_P16114	AT1G09350	AtGolS3 (Arabidopsis thaliana galactinol synthase 3); transferase	0.459433	-1.11135	0.294128
GT_A_84_P16882	AT5G48540	33 kDa secretory protein-related	0.459469	-1.13067	0.42961
GT_A_84_P14903	AT5G11920	AtcwINV6 (6-&1-fructan exohydrolase); hydrolase, hydrolyzing O-glycosyl compounds	0.460264	-1.14093	0.475276
GT_A_84_P219958	AT5G42760	hypothetical protein	0.460779	-1.53103	0.472707
GT_A_84_P711024			0.463475	-1.24641	0.450564
GT_A_84_P22942	AT2G41260	M17	0.464598	-2.43347	0.419407
GT_A_84_P144579	AT3G07850	exopolygalacturonase / galacturan 1,4-alpha-galacturonidase / pectinase	0.466422	-3.84453	0.281231
GT_A_84_P22300	AT4G08300	nodulin MtN21 family protein	0.466565	-1.23691	0.46079
GT_A_84_P820248		TA35479_3702	0.468399	-1.0699	0.448907
GT_At_Specific_00146175		AT3G13240	0.468643	-1.06236	0.419407
GT_A_84_P833445	AT1G26790	AT1G26790.1	0.469165	-1.77457	0.398325
GT_A_84_P183494	AT4G24700	hypothetical protein	0.469753	-1.32901	0.413787
GT_A_84_P18935	AT1G80660	AHA9; hydrogen-exporting ATPase, phosphorylative mechanism	0.469946	-1.75578	0.281231
GT_A_84_P11328	AT1G20470	auxin-responsive family protein	0.47253	-1.03282	0.382681
GT_A_84_P11960	AT4G27220	disease resistance protein (NBS-LRR class), putative	0.474486	-3.52585	0.428357
GT_A_84_P20644	AT5G42840	DC1 domain-containing protein	0.476407	-1.0189	0.405451
GT_A_84_P757994	AT2G18328	AT2G18328.1	0.476521	-1.15417	0.335302
GT_A_84_P529186	AT5G44575	hypothetical protein	0.479921	-1.77221	0.448907
GT_A_84_P816246		AT3G19450.1	0.482271	-1.27458	0.27811
GT_A_84_P21942	AT1G51850	leucine-rich repeat protein kinase, putative	0.483454	-1.33691	0.177522
GT_A_84_P792453		EG466902	0.486235	-2.14908	0.457513
GT_A_84_P601919	AT4G34550	hypothetical protein	0.488098	-1.052	0.350898
GT_A_84_P19135	AT2G28630	KCS12 (3-KETOACYL-COA SYNTHASE 12); acyltransferase/ catalytic/ transferase	0.492566	-1.17923	0.382681
GT_A_84_P795530	AT5G22390	AT5G22390.1	0.496035	-1.11823	0.492282
GT_A_84_P855714		DR272223	0.498417	-1.82362	0.467764
GT_A_84_P556074	AT1G70985	hydroxyproline-rich glycoprotein family protein	0.49855	-1.63912	0.42676
GT_A_84_P103016	AT4G12500	protease inhibitor/seed storage/lipid transfer protein (LTP) family protein	0.49972	-1.34939	0.450564
GT_A_84_P19895	AT1G04600	XIA (MYOSIN XI A); motor/ protein binding	0.503238	-1.9232	0.46079
GT_A_84_P23772	AT1G62890		0.504264	-1.05397	0.251565
GT_A_84_P856982		AT3G02040.1	0.506244	-1.33307	0.419407
GT_A_84_P235073	AT1G73870	zinc finger (B-box type) family protein	0.512276	-1.91354	0.448907
GT_A_84_P18474	AT3G59400	GUN4; enzyme binding / tetrapyrrole binding	0.51678	-1.11882	0.412433
GT_A_84_P847169	AT2G02160	AT2G02160.1	0.522131	-1.37831	0.412433
GT_A_84_P592388	AT5G43250	NF-YC13 (NUCLEAR FACTOR Y, SUBUNIT C13); DNA binding / transcription factor	0.529219	-1.1141	0.281231
GT_A_84_P769609	AT5G53048	AT5G53048.1	0.532274	-1.77406	0.217894
GT_A_84_P18353	AT3G19450	ATCAD4; cinnamyl-alcohol dehydrogenase	0.540162	-1.07813	0.251565
GT_A_84_P800502	AT4G21170	AT4G21170.1	0.550375	-1.11827	0.281231
GT_A_84_P801021	AT5G28500	AT5G28500.1	0.565395	-1.6826	0.464086
GT_A_84_P17987	AT1G23140	C2 domain-containing protein	0.567355	-1.01248	0.457513
GT_A_84_P17154			0.572733	-1.32977	0.419407
GT_A_84_P758217	AT2G01120	AT2G01111.1	0.583284	-1.13259	0.405451
GT_A_84_P833200		TA50541_3702	0.585039	-1.25104	0.398325
GT_A_84_P841841	AT5G37590	AT5G37590.1	0.601725	-1.31909	0.373952
GT_A_84_P130356	AT5G20790	hypothetical protein	0.643616	-1.20657	0.294128
